# Enzymology and bioenergetics of respiratory nitrite ammonification

Jörg Simon \*

*Institut für Mikrobiologie, Johann Wolfgang Goethe-Universität, Biozentrum N240, Marie-Curie-Str. 9, D-60439 Frankfurt am Main, Germany*

Received 1 February 2002; received in revised form 9 April 2002; accepted 24 April 2002

First published online 17 June 2002

## Abstract

Nitrite is widely used by bacteria as an electron acceptor under anaerobic conditions. In respiratory nitrite ammonification an electrochemical proton potential across the membrane is generated by electron transport from a non-fermentable substrate like formate or H<sub>2</sub> to nitrite. The corresponding electron transport chain minimally comprises formate dehydrogenase or hydrogenase, a respiratory quinone and cytochrome *c* nitrite reductase. The catalytic subunit of the latter enzyme (NrfA) catalyzes nitrite reduction to ammonia without liberating intermediate products. This review focuses on recent progress that has been made in understanding the enzymology and bioenergetics of respiratory nitrite ammonification. High-resolution structures of NrfA proteins from different bacteria have been determined, and many *nrf* operons sequenced, leading to the prediction of electron transfer pathways from the quinone pool to NrfA. Furthermore, the coupled electron transport chain from formate to nitrite of *Wolinella succinogenes* has been reconstituted by incorporating the purified enzymes into liposomes. The NrfH protein of *W. succinogenes*, a tetraheme *c*-type cytochrome of the NapC/NirT family, forms a stable complex with NrfA in the membrane and serves in passing electrons from menaquinol to NrfA. Proteins similar to NrfH are predicted by open reading frames of several bacterial *nrf* gene clusters. In  $\gamma$ -proteobacteria, however, NrfH is thought to be replaced by the *nrfBCD* gene products. The active site heme *c* group of NrfA proteins from different bacteria is covalently bound via the cysteine residues of a unique CXXCK motif. The lysine residue of this motif serves as an axial ligand to the heme iron thus replacing the conventional histidine residue. The attachment of the lysine-ligated heme group requires specialized proteins in *W. succinogenes* and *Escherichia coli* that are encoded by accessory *nrf* genes. The proteins predicted by these genes are unrelated in the two bacteria but similar to proteins of the respective conventional cytochrome *c* biogenesis systems. © 2002 Federation of European Microbiological Societies. Published by Elsevier Science B.V. All rights reserved.

**Keywords:** Respiratory nitrite ammonification; Formate dehydrogenase; Hydrogenase; Cytochrome *c* nitrite reductase; NapC/NirT family; Cytochrome *c* biogenesis; *Wolinella succinogenes*; NrfA

## Contents

|                                                                                                                              |     |
|------------------------------------------------------------------------------------------------------------------------------|-----|
| 1. Introduction . . . . .                                                                                                    | 286 |
| 2. Respiratory nitrite ammonification in bacteria . . . . .                                                                  | 287 |
| 2.1. Bioenergetic considerations . . . . .                                                                                   | 287 |
| 2.2. Properties of bacteria performing respiratory nitrite ammonification . . . . .                                          | 288 |
| 3. Electron transport chain and coupling mechanism of respiratory nitrite ammonification in <i>W. succinogenes</i> . . . . . | 289 |
| 3.1. The cytochrome <i>c</i> nitrite reductase complex . . . . .                                                             | 289 |
| 3.2. Formate dehydrogenase . . . . .                                                                                         | 292 |
| 3.3. Hydrogenase . . . . .                                                                                                   | 294 |
| 3.4. The coupling mechanism of respiratory nitrite ammonification . . . . .                                                  | 295 |
| 4. Respiratory nitrite ammonification in other proteobacteria . . . . .                                                      | 296 |
| 4.1. $\epsilon$ -Proteobacteria . . . . .                                                                                    | 297 |
| 4.2. $\delta$ -Proteobacteria . . . . .                                                                                      | 298 |
| 4.3. $\gamma$ -Proteobacteria . . . . .                                                                                      | 300 |
| 5. Organization of <i>nrf</i> genes . . . . .                                                                                | 302 |

\* Tel.: +49 (69) 798 29511; Fax: +49 (69) 798 29527. E-mail address: [j.simon@em.uni-frankfurt.de](mailto:j.simon@em.uni-frankfurt.de) (J. Simon).

|                                                                                  |     |
|----------------------------------------------------------------------------------|-----|
| 6. Heme attachment to NrfA . . . . .                                             | 302 |
| 7. Respiratory nitrate reductases in <i>nrfA</i> -containing organisms . . . . . | 303 |
| 8. Concluding remarks . . . . .                                                  | 304 |
| Acknowledgements . . . . .                                                       | 304 |
| References . . . . .                                                             | 304 |

## 1. Introduction

Nitrite is a component of the biological nitrogen cycle which is provided by nitrate reduction or by ammonia oxidation in biological habitats (Fig. 1). Reduction of nitrite can be regarded as an assimilatory, respiratory or dissimilatory process [1]. Assimilatory nitrite reduction serves in the production of ammonia which is incorporated into cell material thus allowing growth with nitrate or nitrite as a nitrogen source. This process occurs in bacteria as well as in plants and fungi and is catalyzed by a cytoplasmic siroheme-containing nitrite reductase that uses either NAD(P)H or ferredoxin as electron donor [2–4]. Notably, this reaction can also be regarded as a dissimilatory process because it serves an NAD(P)-regenerating function [1]. In contrast to dissimilatory nitrite reduction, respiratory nitrite reduction is coupled to the generation of an electrochemical proton potential ( $\Delta p$ ) across the membrane. The  $\Delta p$  is a prerequisite of ADP phosphorylation catalyzed by ATP synthase, according to the chemiosmotic mechanism. Growth by respiratory nitrite reduction is described only for bacteria where it results in the production of either dinitrogen (respiratory denitrification) or ammonia (respiratory nitrite ammonification) (Fig. 1). Both processes are carried out under anaerobic conditions but have not been reported to occur in the same bacterial species.

Enzymes involved in respiratory denitrification were the subject of previous reviews [5,6]. The nitrite reductase involved in this pathway is either a cytochrome *cd*<sub>1</sub> nitrite reductase or a copper-containing nitrite reductase. Both enzymes catalyze nitrite reduction to nitric oxide (NO). NO is subsequently reduced via nitrous oxide (N<sub>2</sub>O) to dinitrogen by NO reductase and N<sub>2</sub>O reductase, respectively. Dinitrogen is reduced to ammonia in prokaryotic nitrogen-fixing organisms. Nitrite ammonification can thus be regarded as a short circuit that bypasses denitrification and nitrogen fixation [7]. The nitrogen cycle is completed by respiratory nitrification with oxygen as electron acceptor. Bacteria of the genus *Nitrosomonas* catalyze ammonia oxidation to nitrite forming hydroxylamine as an intermediate. Species of *Nitrobacter* grow by nitrite oxidation to nitrate.

In respiratory nitrite ammonification, nitrite is reduced to ammonia without the release of intermediate products. The reaction is catalyzed by the cytochrome *c* nitrite reductase, the NrfA protein, which is clearly different from

any NO-producing nitrite reductase. In the course of respiratory nitrite ammonification, a non-fermentable substrate (predominantly formate or H<sub>2</sub>) is oxidized and electrons are transferred via the quinone pool to NrfA. Alternatively, many bacteria use nitrite as an electron sink, thereby replacing intermediates of fermentation which would be reduced in the absence of nitrite. This dissimilatory mode of energy conservation may be called fermentative nitrite ammonification (Fig. 1). In this case ATP is generated by substrate-level phosphorylation (mainly by acetate kinase) using organic substrates like glucose or lactate. Fermentative nitrite ammonification will not be further discussed in this review.

NrfA proteins with similar properties have been purified and characterized from many different organisms, e.g. *Escherichia coli* [8–10], *Desulfovibrio desulfuricans* [11], *Wolfinella succinogenes* [12–14] and *Vibrio fischeri* [15,16]. For many years, the NrfA protein was considered to contain six heme *c* groups, mainly based on absorption and electron paramagnetic resonance (EPR) spectroscopy. In contrast, Schröder et al. [13] reported the presence of four heme *c* groups in NrfA isolated from the *W. succinogenes* membrane fraction. This view was supported at first by the *nrfA* gene sequence of *E. coli* that predicted four heme *c* binding motifs (CXXCH) [17]. The conflict was eventually solved in favor of five heme groups when the unprecedented heme attachment to a CXXCK motif was demonstrated for *E. coli* NrfA in 1998 [18]. Currently, high-resolution structures of NrfA proteins from three different bacteria have been determined and confirm the presence of five heme *c* groups [19–21].

It has long been known that the electron transport from formate (or H<sub>2</sub>) to nitrite generates an electrochemical proton potential across the membrane in intact cells of different bacterial species [22–26]. A quinone seems to be an obligatory component for electron transport from the electron donor substrate to NrfA [13,27]. The complete electron transport chain from formate to nitrite was recently characterized for *W. succinogenes* where the coupled electron transport chain was reconstituted in liposomes from the purified components [26]. In this organism, the NrfA protein is anchored to the membrane by a tetraheme cytochrome *c* (NrfH) which oxidizes menaquinol [26,28]. However, different electron transfer routes from the quinone pool to NrfA seem to be present in phylogenetically distinct bacterial groups.

It is the aim of this article to review the structural and

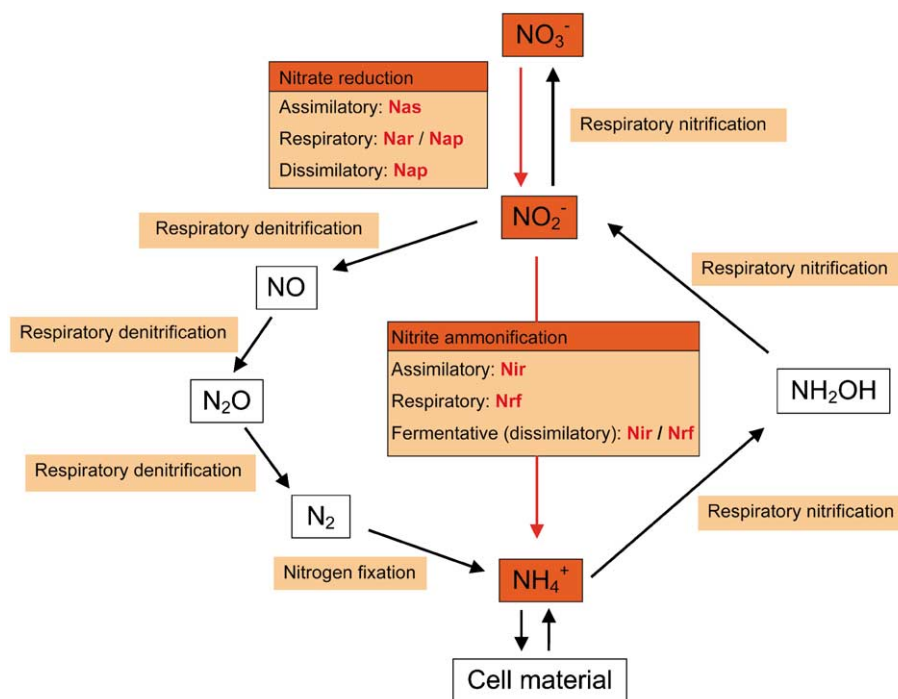

Fig. 1. The biological nitrogen cycle. Nitrate reduction and nitrite ammonification are categorized as assimilatory, respiratory or dissimilatory processes and the abbreviations of the corresponding enzymes are given. The reactions marked by the red arrows are the subject of this article. The designated assimilatory processes are carried out under both aerobic and anaerobic conditions, while the respiratory and dissimilatory processes of nitrate reduction, nitrite ammonification and denitrification are typical anaerobic processes. Nitrogen fixation and nitrification require the presence of oxygen. The 'anammox' process in which ammonia is oxidized anaerobically at the expense of nitrite to yield  $N_2$  and  $2 H_2O$  is left out for clarity. Nas, assimilatory nitrate reductase; Nar, respiratory nitrate reductase; Nap, periplasmic nitrate reductase; Nir, NADH-dependent nitrite reductase; Nrf, cytochrome *c* nitrite reductase.

functional aspects of enzymes involved in respiratory nitrite ammonification, with emphasis on the most recent developments. Respiratory nitrite ammonification and/or the biochemical and biophysical properties of cytochrome *c* nitrite reductase have been reviewed in [4,7,29–37], however, mostly in the broader context of anaerobic respiration or considering various reduced nitrogen compounds. In Section 2 of this article, the bioenergetic basis of respiratory nitrite ammonification is discussed and the relevant properties of bacteria which carry out respiratory nitrite ammonification are briefly summarized. Section 3 addresses the respiratory nitrite ammonification of the rumen bacterium *W. succinogenes* which, in that respect, is the most thoroughly studied organism. The results are compared to those obtained with other bacteria performing respiratory nitrite ammonification in Section 4, highlighting the composition of predicted electron transport chains. Genetic data derived from bacterial genome sequencing are compared in Section 5, laying emphasis on the arrangement of the open reading frames in the vicinity of *nrfA*. The corresponding gene products are predicted to be involved either in quinol oxidation and electron transfer to NrfA or in heme attachment to NrfA. The latter process contributes to the understanding of bacterial cytochrome *c* biogenesis and is discussed in Section 6. Finally, in Section 7, a short overview is given on respiratory nitrate reductases in *nrfA*-containing organisms.

## 2. Respiratory nitrite ammonification in bacteria

### 2.1. Bioenergetic considerations

The standard redox potential at pH 7.0 ( $E_0'$ ) of the redox pair  $NO_2^-/NH_4^+$  is +0.34 V thus making nitrite a suitable electron acceptor for anaerobic respiration where it is reduced in a six-electron step to ammonia:

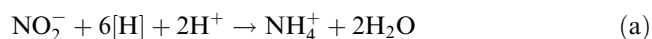

Formate and  $H_2$  are common electron donors in respiratory nitrite ammonification. These substrates are oxidized according to reactions b and c. In addition, sulfide was shown to function as electron donor for respiratory nitrite ammonification in *Sulfurospirillum deleyianum* according to reaction d [38]. The  $E_0'$  values for the redox pairs formate/ $CO_2$  (-0.42 V),  $H_2/H^+$  (-0.42 V) and  $HS^-/S$  (-0.27 V) make reactions b–d strongly exergonic:

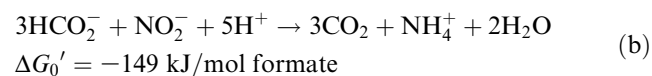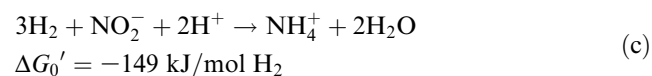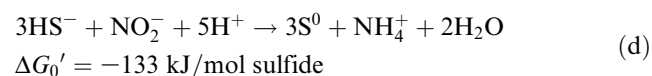

The  $H^+/e$  ratio designates the number of protons apparently translocated across the membrane per mol electrons transported from the donor to the acceptor substrate. The theoretical maximum  $H^+/e$  ratio,  $(n_{H^+}/n_e)_{\max}$ , can be calculated according to:

$$(n_{H^+}/n_e)_{\max} = \Delta E_0'/\Delta p \quad (1)$$

Assuming a  $\Delta p$  of 0.17 V [26],  $(n_{H^+}/n_e)_{\max}$  for nitrite ammonification is nearly 4.5 with formate or  $H_2$  as electron donor. This means that the actual  $H^+/e$  ratio could be up to 4, assuming that it has to be an integer number. The  $(n_{H^+}/n_e)_{\max}$  value with sulfide as electron donor is calculated to be 4.0.

The ATP/e ratio designates the amount of ATP formed from ADP and inorganic phosphate per mol electrons transported from the donor to the acceptor substrate. The theoretical maximum ATP/e ratio,  $(n_{ATP}/n_e)_{\max}$ , is determined according to:

$$(n_{ATP}/n_e)_{\max} = \Delta E_0' \cdot F / \Delta G_P' \quad (2)$$

where  $F$  represents the Faraday constant. The term  $\Delta G_P'$  designates the cellular phosphorylation potential at pH 7.0 which is in the range of 50 kJ/mol ATP [39]. The maximum ATP/e ratio is calculated to be 1.5 for nitrite ammonification with formate or  $H_2$  and 1.3 with sulfide as electron donor. These values are in agreement with the obtained  $(n_{H^+}/n_e)_{\max}$  values when the number of protons translocated per ATP synthesized is assumed to be 3. It should be noted that the determination of the ATP/e and

$H^+/e$  ratios could be impaired by the transport of substrates across the energized membrane. Therefore, the theoretical values above were calculated based on the assumption that the catalytic sites for formate,  $H_2$ , sulfide and nitrite are located outside the cell. Alternatively, any transport process has to be ATP-independent or electro-neutral.

## 2.2. Properties of bacteria performing respiratory nitrite ammonification

Bacterial species that were shown to carry out respiratory nitrite ammonification belong to either the  $\gamma$ -,  $\delta$ - or  $\epsilon$ -subclass of the proteobacteria (Table 1). All these bacteria contain menaquinone (or demethylmenaquinone) as the predominant quinone under anaerobic conditions, and use a variety of other electron acceptors for anaerobic respiration. It is likely that many more bacteria carry out respiratory nitrite ammonification. Candidates are bacteria which contain either a formate dehydrogenase or a hydrogenase, a respiratory quinone and a cytochrome  $c$  nitrite reductase.

The bacterium growing fastest at the expense of respiratory nitrite ammonification with formate as electron donor is the  $\epsilon$ -proteobacterium *W. succinogenes* that was isolated by Wolin from bovine rumen fluid in the early 1960s [55]. Today, *W. succinogenes* is regarded as the only species of its genus [41]. The electron transport chains involved in *W. succinogenes* fumarate or polysulfide respi-

Table 1  
Properties of organisms that perform respiratory nitrite ammonification

| Organism <sup>a</sup>                                                           | Electron donor       | Doubling time <sup>b</sup> (h)      | Molar growth yield ( $Y_M$ ) <sup>b</sup> (g dry cells (mol $NO_2^-$ ) <sup>-1</sup> ) | Alternative electron acceptors in anaerobic respiration                 | Major quinone under anaerobic conditions <sup>c</sup> | References    |
|---------------------------------------------------------------------------------|----------------------|-------------------------------------|----------------------------------------------------------------------------------------|-------------------------------------------------------------------------|-------------------------------------------------------|---------------|
| <i>Wolinella succinogenes</i> ( $\epsilon$ )                                    | Formate              | 2.0 <sup>c</sup>                    | 15.9 <sup>c</sup> , 25.5 <sup>d</sup>                                                  | $NO_3^-$ , $N_2O$ , fumarate, polysulfide, DMSO                         | MK-6, MMK-6                                           | [40–43]       |
| <i>Sulfurospirillum deleyianum</i> ( $\epsilon$ )                               | Formate              | 7.1 <sup>c</sup> , 9.0 <sup>f</sup> | 9.6 <sup>c</sup> , 6.0 <sup>f</sup>                                                    | $NO_3^-$ , fumarate, $S^0$ , $SO_3^{2-}$ , $S_2O_3^{2-}$ , DMSO         | MK-6, MMK-6                                           | [38,44–46]    |
| <i>Campylobacter sputorum</i> biovar <i>bubulus</i> ( $\epsilon$ ) <sup>g</sup> | Sulfide              | 11.0 <sup>f</sup>                   | 4.5 <sup>f</sup>                                                                       | $NO_3^-$ , fumarate, $S^0$ , $SO_3^{2-}$ , $S_2O_3^{2-}$ , DMSO         | n.r.                                                  | [47–49]       |
| <i>Desulfovibrio desulfuricans</i> ( $\delta$ )                                 | $H_2$ , formate      | 3.6 <sup>f</sup>                    | 8.8 <sup>f</sup> , 12.6 <sup>d</sup>                                                   | $NO_3^-$ , $SO_4^{2-}$ , $S_2O_3^{2-}$ , $S^0$ , $SO_3^{2-}$ , fumarate | MK-6, MK-5                                            | [24,45,50–52] |
| <i>Desulfovibrio gigas</i> ( $\delta$ )                                         | $H_2$                | n.r.                                | n.r.                                                                                   | $SO_4^{2-}$ , $S_2O_3^{2-}$ , $S^0$ , $SO_3^{2-}$ , fumarate            | MK-6, MK-5                                            | [25,45,53]    |
| <i>Escherichia coli</i> ( $\gamma$ )                                            | Formate <sup>i</sup> | n.r.                                | n.r.                                                                                   | $NO_3^-$ , fumarate, DMSO, TMAO                                         | MK-8, DMK-8                                           | [22,23,32,54] |

n.r.: not reported; MK: menaquinone; MMK: [5 or 8]-methylmenaquinone; DMK: demethylmenaquinone.

<sup>a</sup>The Greek letter in parentheses denotes the phylogenetic subclass of the proteobacteria.

<sup>b</sup>Doubling times and growth yields were usually determined in minimal medium with the indicated electron donor and nitrite as electron acceptor. Likewise, the parameters were determined in a batch culture with nitrate as electron acceptor when nitrate was completely reduced to nitrite.

<sup>c</sup>Growth with succinate as carbon source.

<sup>d</sup>Molar growth yield of a continuous culture extrapolated to infinite growth rate ( $Y_{\max}$ ).

<sup>e</sup>Numbers following the abbreviation of the quinone refer to the number of isoprene units in the side chain.

<sup>f</sup>Growth with acetate as carbon source.

<sup>g</sup>Growth was examined in a complex medium with nitrite as electron acceptor.

<sup>h</sup>Calculated from the dilution rate of a chemostat culture.

<sup>i</sup>Formate is the predominant electron donor in respiratory nitrite ammonification of *E. coli* (cf. Section 4.3.2).

ration were investigated in great detail (see [39,56] for recent reviews). Apart from formate,  $H_2$  and sulfide were also shown to serve as electron donors for fumarate respiration [57,58]. It is likely that *W. succinogenes* can also grow with  $H_2$  or sulfide and nitrite as sole energy substrates according to reactions c and d. Species of the genus *Campylobacter* are close relatives of *W. succinogenes*. In contrast to *W. succinogenes*, *Campylobacter* spp. grow only in enriched media because of their complex nutritional requirements. However, *Campylobacter sputorum* biovar *bubulus* was shown to grow by respiratory nitrite ammonification with formate [47]. Another  $\epsilon$ -proteobacterium that grows by respiratory nitrite ammonification with formate or sulfide is the free-living *S. deleyianum* (formerly *Spirillum* 5175) which was originally isolated as a sulfur-reducing organism [38,49].

Many sulfate-reducing bacteria catalyze nitrite reduction to ammonia in a dissimilatory process using substrates that allow substrate-level phosphorylation [59,60]. Furthermore, nitrite ammonification at the expense of sulfide oxidation to sulfate was described for *D. desulfuricans* and *Desulfobulbus propionicus* [61]. Respiratory nitrite ammonification was reported only for *D. desulfuricans* and *Desulfovibrio gigas* (Table 1 and Section 4.2). *D. desulfuricans* was shown to prefer ammonification of nitrite (or nitrate) over sulfate reduction when both substrates were present [51]. Such behavior might reflect the fact that nitrate and nitrite are both energetically more favorable electron acceptors than sulfate [ $E_0'(\text{SO}_4^{2-}/\text{HS}^-) = -0.22$  V] which has to be activated in an ATP-consuming process to adenosine 5'-phosphosulfate.

### 3. Electron transport chain and coupling mechanism of respiratory nitrite ammonification in *W. succinogenes*

Electron transport to nitrite in *W. succinogenes* was studied in great detail [13,26,28,40]. The reduction of nitrite by formate or  $H_2$  (reactions b and c) is catalyzed by intact cells or by the bacterial membrane fraction. The electron transport activity from formate to nitrite in cells was measured as  $3.6 \mu\text{mol}$  formate oxidized  $\text{min}^{-1}$  ( $\text{mg}$  dry cell  $\text{wt}^{-1}$ ) at  $37^\circ\text{C}$  [28]. This value is well above the theoretical electron transport activity ( $v_{\text{min}}$ ) of  $1.1 \mu\text{mol}$  formate oxidized  $\text{min}^{-1}$  ( $\text{mg}$  dry cell  $\text{wt}^{-1}$ ) calculated according to Eq. 3 from the growth rate ( $\mu$ ) and the molar growth yield ( $Y_M$ ) (Table 1):

$$v_{\text{min}} = \mu / Y_M \quad (3)$$

The electron transport activities from formate or  $H_2$  to nitrite were abolished upon extraction of menaquinone from the membrane, and were restored upon incorporation of vitamin  $K_1$  into the extracted membrane [13,40]. The current view of the electron transport chain from formate or  $H_2$  to nitrite is depicted in Fig. 2. The constituents of the electron transport chain (cytochrome *c* nitrite

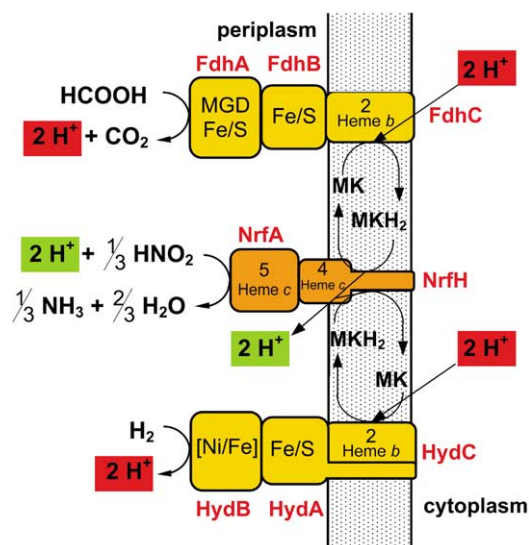

Fig. 2. Enzyme complexes involved in electron transport from formate or  $H_2$  to nitrite in *W. succinogenes*. The names of the protein subunits making up formate dehydrogenase (Fdh), hydrogenase (Hyd) or cytochrome *c* nitrite reductase (Nrf) are shown in red. The hypothetical mechanism of  $\Delta p$  generation is depicted by protons drawn with different color backgrounds. A red background denotes protons that are involved in the electrogenic oxidation of formate or  $H_2$  by MK thus generating  $\Delta p$  by a redox loop mechanism. Protons with a green background are involved in the electroneutral reduction of nitrite by  $\text{MKH}_2$ , and do not contribute to  $\Delta p$  generation. Substrates and products of the redox reactions are drawn in their neutral forms for simplicity. MGD, molybdenum linked to molybdopterin guanine dinucleotide; Fe/S, iron-sulfur centers.

reductase, formate dehydrogenase and hydrogenase) are described in the following subsections. The three enzymes are multi-subunit complexes that react with quinones and are anchored in the membrane by either a cytochrome *c* or a cytochrome *b* subunit. The catalytic sites for nitrite, formate or  $H_2$  are oriented towards the periplasmic side of the membrane. The electron transport chain from formate to nitrite was reconstituted from the isolated enzymes in proteoliposomes (cf. Section 3.4).

#### 3.1. The cytochrome *c* nitrite reductase complex

The cell homogenate of *W. succinogenes* grown with nitrate as electron acceptor catalyzes nitrite reduction to ammonia by benzyl viologen radical ( $\text{BV}^+$  in reaction e) with a specific activity of up to  $50 \mu\text{mol}$  nitrite reduced  $\text{min}^{-1}$  ( $\text{mg}$  cell protein  $^{-1}$ ) at  $37^\circ\text{C}$  [62]. In contrast, the specific activity in homogenates of cells grown with nitrite or fumarate amounted to approximately 20% or 5% of that of nitrate-grown cells [62].

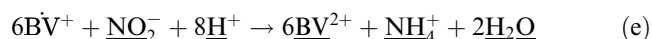

Reaction e is catalyzed by both the soluble cell fraction ( $\sim 30\%$  of the total activity) and the membrane fraction ( $\sim 70\%$ ) of nitrate-grown cells [12,13]. The activity is absent in both fractions of a *nrfA* deletion mutant indicating



that the cytochrome *c* nitrite reductase (NrfA) is the only enzyme catalyzing reaction e [26,63]. NrfA is located in the periplasm or at the periplasmic membrane surface [26] which is typical for *c*-type cytochromes [64]. The soluble NrfA of *W. succinogenes* was first isolated by Liu et al. [12] and its crystal structure was solved recently at 1.6 Å resolution [20] (cf. Section 3.1.1). NrfA from the membrane fraction was isolated initially as a single polypeptide with similar properties to the soluble NrfA [13,14]. Later, it was also purified in a stable complex with a 22-kDa *c*-type cytochrome using two different isolation protocols [14,26]. The subunits of this complex could be separated by SDS-PAGE. The 22-kDa cytochrome *c* was identified as the *nrfH* gene product which mediates the electron transport between menaquinol and NrfA [26] (cf. Section 3.1.2). The *nrfH* and *nrfA* genes are part of the *nrfHAIJ* operon on the *W. succinogenes* genome [26] (cf. Section 5). It was found that only the NrfHA complex was capable of catalyzing the oxidation of the water-soluble menaquinol analogue 2,3-dimethyl-1,4-naphthoquinol (DMNH<sub>2</sub>) by nitrite (reaction f) whereas the NrfA protein alone was not [26].

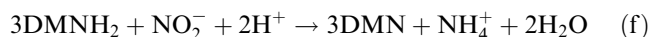

The catalysis of reaction f was inhibited upon addition of 2-*n*-heptyl-4-hydroxyquinoline *N*-oxide (HQNO) (R. Gross and J. Simon, unpublished). The results suggest that NrfH contains a menaquinone-binding site. When the *nrfH* gene was inactivated by the introduction of stop codons, the cells of the corresponding *W. succino-*

*genes* mutant contained NrfA exclusively in the soluble cell fraction [28]. The NrfA protein of this mutant catalyzed nitrite reduction by benzyl viologen radical, but electron transport from formate to nitrite was absent. These results indicate that NrfH functions as the membrane anchor of the NrfHA complex and that it is an essential constituent of the electron transport chain catalyzing respiratory nitrite ammonification.

In fumarate-grown cells NrfA and the nitrite reductase activity with benzyl viologen radical are found in the membrane fraction but not in the soluble cell fraction. In this case, NrfA is apparently present only in the NrfHA complex. In nitrate-grown bacteria NrfA is possibly produced in excess of NrfH resulting in additional periplasmic NrfA.

### 3.1.1. The catalytic subunit NrfA

*W. succinogenes* NrfA is synthesized as a pre-protein carrying a typical Sec-dependent signal peptide of 22 residues [26]. The N-terminus of mature NrfA was determined and confirmed the predicted cleavage site [65]. The molecular mass of NrfA purified from either the soluble or the membrane fraction was determined to be 58 339 Da by MALDI mass spectrometry [28,63]. This value is in agreement with that calculated for mature NrfA (55 251 Da) carrying five covalently bound heme groups of mass 616 each. The size of NrfA was estimated from SDS-PAGE to be 63 kDa [12,13] or 55 kDa [14]. The presence of five covalently bound heme groups was unequivocally demonstrated by the crystal structure of *W. succinogenes*

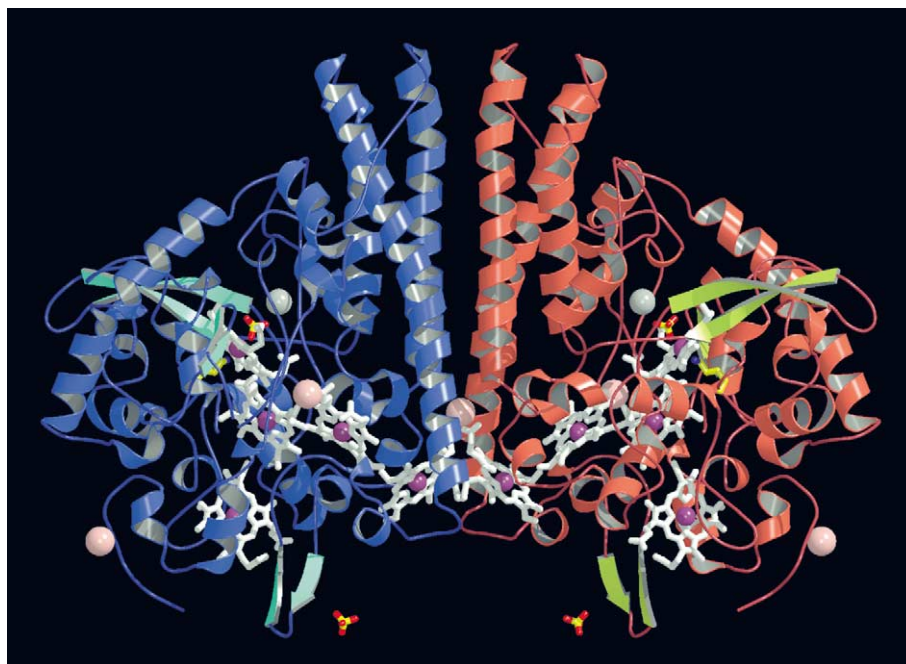

Fig. 3. Overall structure of the cytochrome *c* nitrite reductase (NrfA) homodimer of *W. succinogenes*. Monomers are shown in red and blue, respectively. Dimer formation is facilitated by the central helical segments. Heme groups are shown in white and their central iron atoms in purple. The active site is occupied by a sulfate ion, the nearby Ca<sup>2+</sup> ion is shown in gray. The axial ligand to the active site heme group (lysine 134) is shown in yellow. Pink spheres designate yttrium ions (Y<sup>3+</sup>) that derived from the crystallization buffer.

NrfA isolated from the soluble cell fraction (Fig. 3) [20]. Before the structure became available, the NrfA protein was considered to contain four or six heme groups [12,13,66].

The crystal structure of *W. succinogenes* NrfA was solved to a resolution of 1.6 Å and demonstrated the formation of a compact homodimer with an overall structure similar to those of the NrfA dimers from *S. deleyianum* [19] and *E. coli* [21] (cf. Section 4). The distances between the five heme groups of a monomer are suited for rapid electron transfer with the longest iron-to-iron distance being 12.5 Å. The iron-to-iron distance between the two nearest heme groups of two different NrfA monomers (11.7 Å) would allow electron transfer between the monomers. The iron atom of the active site heme group (heme 1) is co-ordinated by the lysine residue (K134) of a unique CWTK motif. The cysteine residues of this motif serve in covalent heme attachment by forming two thioether bridges with the heme vinyl groups, similar to the attachment of hemes 2–5 to four conventional CXXCH motifs of NrfA (X meaning any residue). The iron atoms of heme groups 2–5 are axially ligated by two histidine residues each. Nitrite is thought to bind at the distal site of heme 1 which is occupied by a sulfate ion in the crystal structure. Sulfate is known as a weak inhibitor of nitrite reductase activity [67]. In addition, crystal structures with water or azide in the active center were obtained [20]. Near the active site, a Ca<sup>2+</sup> ion was found which is required for catalysis although its detailed function is not clear [67]. All residues involved in Ca<sup>2+</sup> binding are conserved in the available NrfA sequences [20]. Nitrite is reduced at the active site with bound NO and NH<sub>2</sub>OH as probable intermediates [19,68]. It is notable that NrfA proteins are known to reduce added NO and NH<sub>2</sub>OH, however at lower rates than nitrite [13,67].

Replacement by histidine of the active site lysine ligand (K134) in *W. succinogenes* resulted in a NrfA protein that still contained five heme groups as judged by MALDI mass spectrometry [63]. It is likely that the histidine residue of the generated CWTK motif replaces the lysine residue as axial heme ligand. The activity of nitrite reduction by reduced benzyl viologen (reaction e) of the modified NrfA amounted to 40% of the wild-type activity [63]. The  $K_M$  value for nitrite (0.1 mM [13]) of the purified enzyme was not altered by the modification and ammonia was formed as the only product of nitrite reduction. The *W. succinogenes* mutant which produces the modified NrfA did not grow by respiratory nitrite ammonification and its rate of electron transport from formate to nitrite amounted to only 5% of that of the wild-type strain [63]. This drastic inhibition of electron transport may be explained by a decreased redox potential of heme 1 that lowers the velocity of electron transfer to the active site heme group from the other hemes which are involved in menaquinol oxidation. In contrast, reduced benzyl viologen is thought to react directly with heme 1. Site-directed

mutagenesis was also carried out with *E. coli nrfA* which is discussed in Section 4.3.1.

Two different channels that lead from the enzyme surface to the active site were discovered in NrfA. A positively charged channel is thought to be the nitrite entry pathway, whereas ammonium possibly leaves the active site via the other, negatively charged channel. It is likely that the enzyme turnover benefits from two distinct pathways for the oppositely charged substrate and product molecules. The entry point for electrons delivered by NrfH is not clear. Heme 2 (the heme group nearest to the bottom in Fig. 3) is the most likely initial electron acceptor as it has contact with the enzyme surface within a patch of strong positive surface potential suitable for interaction with NrfH [20]. The stability of the NrfHA complex is thought to be largely dependent on such electrostatic interactions. Heme 5 (the heme group nearest the homodimer interface) is an alternative electron entry point although the corresponding surface area is largely covered by the second NrfA monomer within the dimer.

In recent years, certain structural arrangements of covalently bound heme groups (so-called heme packing motifs) were found to be conserved in multiheme *c*-type cytochromes even when the corresponding amino acid sequences are not similar [69]. In NrfA, hemes 2 and 3 as well as hemes 4 and 5 form a ‘diheme elbow motif’ with the heme planes situated almost perpendicular to each other [20]. This motif is found in a variety of other *c*-type cytochromes, e.g. in cytochrome *c*<sub>3</sub> of sulfate-reducing bacteria. Hemes 3 and 4 form a ‘heme stacking motif’ in which the porphyrin planes are nearly parallel to each other with an edge-to-edge distance below 4 Å. Interestingly, the structural arrangement of the five NrfA heme groups corresponds to that of five of the eight hemes of the hydroxylamine oxidoreductase of *Nitrosomonas europaea* that catalyzes the oxidation of hydroxylamine to nitrite [19,20,70].

A wealth of EPR spectroscopic data obtained with NrfA proteins, including *W. succinogenes* NrfA, has been published [14,21,31,34,66,71–76]. The spectra are broadly similar but surprisingly complex when compared to those of other *c*-type cytochromes. Typically, oxidized NrfA proteins exhibit perpendicular mode X-band EPR signals at  $g \approx 2.9$ , 2.3 and 1.5 that are likely components of a rhombic Fe(III) signal and are therefore assigned to low-spin bis-His-ligated ferric heme. Additional resonances at low field regions ( $g \approx 10$  and 3.7) indicate the presence of high-spin ferric heme which was also confirmed by MCD spectroscopy [21,72,77]. Preparations containing NrfA purified from the membrane fraction contained a signal at  $g = 4.8$  that probably arises by spin–spin interaction among heme groups and is found in samples from *W. succinogenes* [14,72], *S. deleyianum* [14], *D. desulfuricans* [71,73–75] and *Desulfovibrio vulgaris* [77]. The  $g = 4.8$  signal is interpreted to be indicative of the complex between NrfA and its redox partner NrfH (cf. Sections 3.1.2 and

4.2). This signal does not appear in NrfA preparations from the soluble cell fraction of either *W. succinogenes* [14,66], *S. deleyianum* [14] or *E. coli* [21,66]. A detailed consideration of the spectroscopic data is beyond the scope of this review. Furthermore, most reports predated the determination of the NrfA crystal structures and were interpreted assuming the presence of six heme groups. The reader is referred to a recent re-examination of the spectroscopic data in the light of the *E. coli* NrfA crystal structure [21].

### 3.1.2. The membrane anchor subunit NrfH

The NrfH protein of *W. succinogenes* is a membrane-bound tetraheme cytochrome *c* that forms a quinone-reactive complex with NrfA in the membrane [26]. Its identity was confirmed by N-terminal sequencing of a peptide fragment obtained upon BrCN cleavage [26]. The molecular mass of NrfH was determined as 22 221 Da by MALDI mass spectrometry [28]. This value is consistent with that calculated from the *nrfH* gene (19 667 Da) assuming the covalent attachment of four heme *c* groups which is predicted by the presence of four CXXCH heme binding motifs in the NrfH sequence (Fig. 4). Crystals of the *W. succinogenes* NrfHA complex were reported recently [78] but structural information is not yet available.

NrfH belongs to the NapC/NirT family of *c*-type cytochromes that are generally thought to be membrane-bound electron transfer mediators between the quinone pool and periplasmic oxidoreductases (see [28,79] for an overview). In that respect, NrfH seems to be an exceptional member of the family as it forms a stable complex with NrfA. Each member of the NapC/NirT family contains a hydrophobic stretch of approximately 20 amino acid residues near its N-terminus which is considered to function as a membrane anchor (Fig. 4). To date, about 30 members of the family are known, however, for most of them only the predicted primary sequence is available. Beside NrfH, at least two other members of the family are involved in reduction of nitrite or nitrate. The NirT protein is a possible electron donor for the periplasmic cytochrome *cd*<sub>1</sub> nitrite reductase involved in denitrification of *Pseudomonas stutzeri* [80]. However, this function is carried out by other redox proteins in cells of *Paracoccus pantotrophus* [81]. The NapC protein is thought to be the redox partner for the nitrate reductase complex (NapAB) found in the periplasm of various bacteria [82,83]. Other NapC-like proteins, namely DmsC, DorC or TorC, are likely electron donors for periplasmic dimethylsulfoxide (DMSO) reductase or trimethylamine *N*-oxide (TMAO) reductase. These proteins carry an additional C-terminal domain of about 185 residues that contains a fifth heme *c* binding motif (Fig. 4). The C-terminal domain is envisaged to function as a mediator of electron transport between the tetraheme domain and the TMAO or DMSO reductase [84].

So far, little biochemical knowledge about cytochromes of the NapC/NirT family is available and no structural information has been reported. After replacing the hydrophobic N-terminus by a cleavable signal peptide, the soluble tetraheme domain of *P. pantotrophus* NapC was purified from the bacterial periplasm [79]. Magneto-optical spectroscopic methods led to the identification of four bis-histidine-ligated low-spin heme groups. The spectrophotometric redox titration curve fitted to four Nernst curves centered at  $-56$ ,  $-181$ ,  $-207$  and  $-235$  mV, respectively. The CymA protein from *Shewanella frigidimarina* NCIMB400, a membrane-bound NapC homologue whose redox partner is not known, was purified in its native form [85]. All four heme groups were found to be bis-histidine-ligated with estimated midpoint potentials of  $+10$ ,  $-108$ ,  $-136$ , and  $-229$  mV. The likely axial heme iron ligands of NapC and CymA are marked in Fig. 4. The DorC protein from *Rhodobacter capsulatus* which is involved in electron transfer to the periplasmic DMSO reductase was purified as a fusion protein [86]. DorC contains five heme *c* groups with estimated midpoint potentials of  $-34$ ,  $-128$ ,  $-184$ ,  $-185$ , and  $-276$  mV. All three purified members of the NapC/NirT family were reported to be at least partially reduced by water-soluble quinols [79,85,86].

The sequences of seven NrfH proteins are currently known (Fig. 4). The corresponding genes were identified upstream of *nrfA* homologs and a function similar to that demonstrated for *W. succinogenes* NrfH is expected. Interestingly, only two of the likely axial heme ligands in NapC and CymA are conserved in the NrfH sequences. Therefore, NrfH proteins possibly possess a heme ligation pattern different from that of NapC proteins. Beside histidine, conserved methionine or lysine residues which may serve as axial heme ligands are highlighted in Fig. 4. To clarify this point more information is required which may derive from future site-directed mutagenesis experiments, spectroscopic studies or redox potentiometry. It is notable that NrfH of *Carboxydotherrmus hydrogenoformans* is predicted to contain only three histidine residues in addition to those arranged in CXXCH motifs. Therefore, at least one heme group is assumed not to be bis-histidine-ligated. This may also hold true for DorC from *R. capsulatus* which contains only three histidine residues in the N-terminal tetraheme domain, apart from those within the CXXCH motifs. In this case, however, four other histidines are present at the C-terminal side of the fifth CXXCH motif.

### 3.2. Formate dehydrogenase

The *W. succinogenes* formate dehydrogenase catalyzes the reduction of menaquinone by formate:

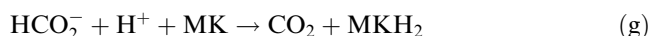

The enzyme consists of two hydrophilic (FdH A and FdH B)



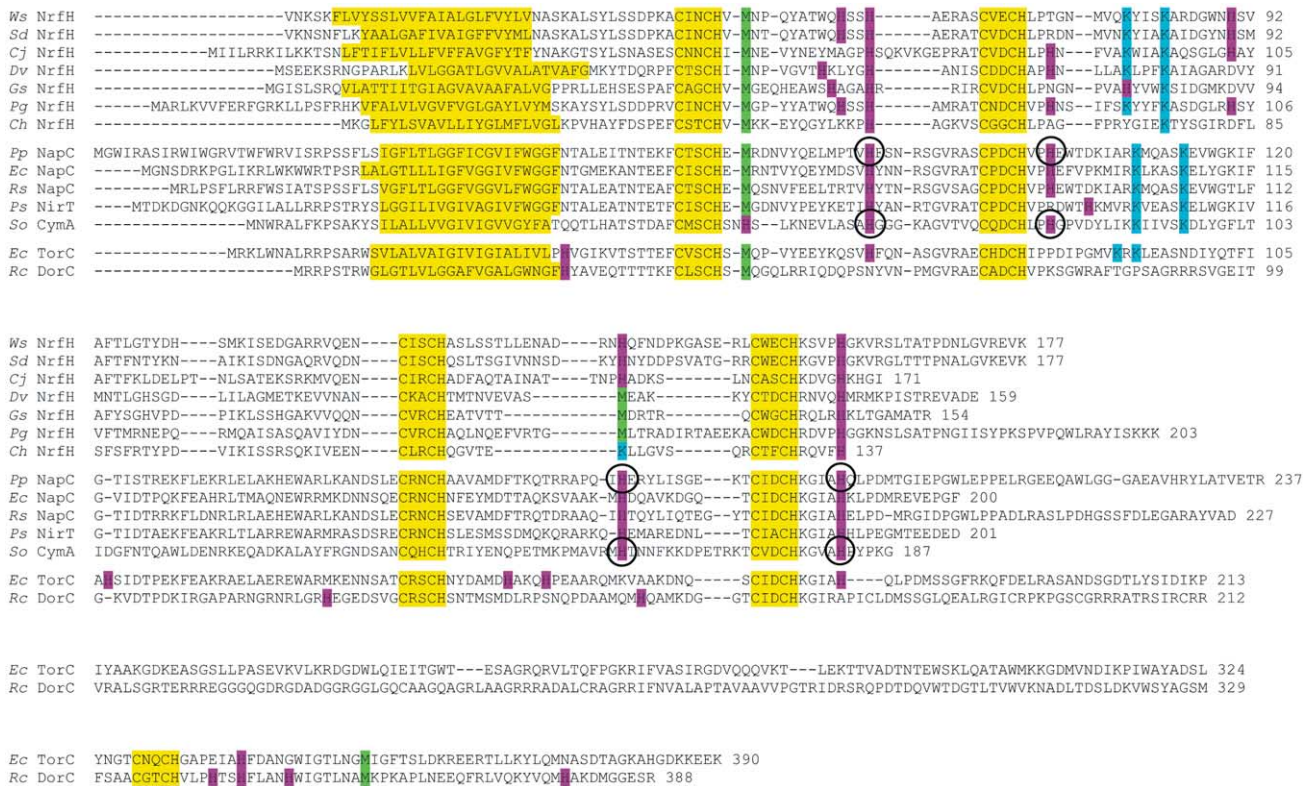

Fig. 4. Multiple sequence alignment of representative members of the NapC/NirT family. The upper seven sequences are those of NrfH proteins from different bacteria. The next five sequences belong to the ‘NapC subgroup’ which is characterized by conserved histidine residues that possibly serve as axial heme iron ligands. Encircled histidine residues belong to proteins for which bis-histidine ligation of all four heme groups was shown [79,85]. The last two sequences belong to the ‘pentaheme subgroup’ of the family containing an additional C-terminal monoheme domain. Sequences of the latter two subgroups were only considered when the corresponding protein was characterized biochemically. The putative N-terminal transmembrane domain and the heme binding motifs are highlighted in yellow. Conserved histidine (pink), methionine (green) and lysine (blue) residues are possible axial heme ligands. *Ws*: *Wolinella succinogenes*; *Sd*: *Sulfurospirillum deleyianum*; *Cj*: *Campylobacter jejuni*; *Dv*: *Desulfovibrio vulgaris*; *Gs*: *Geobacter sulfurreducens*; *Pg*: *Porphyromonas gingivalis*; *Ch*: *Carboxydotherrnus hydrogenoformans*; *Pp*: *Paracoccus pantotrophus*; *Ec*: *Escherichia coli*; *Rs*: *Rhodobacter sphaeroides*; *Ps*: *Pseudomonas stutzeri*; *So*: *Shewanella oneidensis*; *Rc*: *Rhodobacter capsulatus*.

and one hydrophobic subunit (FdhC) (Fig. 2). The three subunits are encoded by the corresponding genes within the *fdhEABCD* operon that is found twice on the *W. succinogenes* genome [87,88]. The catalytic subunit FdhA contains molybdenum coordinated by molybdopterin guanine dinucleotide and is predicted to carry a [4Fe–4S] iron–sulfur cluster [87,89]. FdhB most likely carries four [4Fe–4S] or, alternatively, one [3Fe–4S] and three [4Fe–4S] iron–sulfur centers. FdhC is a diheme cytochrome *b* that reacts with menaquinone and anchors the enzyme in the membrane [90,91]. The catalytic subunit of the formate dehydrogenase is oriented towards the periplasmic side of the membrane [92]. This observation is in line with the fact that the pre-protein of FdhA is predicted to contain an N-terminal double-arginine export sequence [93]. The functions of the putative *fdhD* and *fdhE* gene products are not known. It is likely that these proteins play a role in the biogenesis of the formate dehydrogenase complex.

The structure of *W. succinogenes* formate dehydrogenase is not known but is expected to be similar to that of the *E. coli* FdnGHI complex (formate dehydrogenase-N) [94]. The catalytic subunit (FdnG) contains molybde-

num coordinated by two molybdopterin dinucleotide molecules. The catalytic site is accessible through a large cleft allowing substrate and products to enter and leave the enzyme. Similar three-dimensional structures were determined for other catalytic subunits of molybdoenzymes like DMSO reductase from *Rhodobacter* species [95], periplasmic nitrate reductase from *D. desulfuricans* [96] and *E. coli* formate dehydrogenase-H [97]. The high-resolution structure of the FdnGHI complex implies that the electrons obtained from formate oxidation are transported via five [4Fe–4S] clusters (one in FdnG and four in FdnH) to the diheme cytochrome *b* subunit FdnI. The five iron–sulfur centers are arranged in a straight line that is extended by the two heme *b* groups which are situated nearly on top of each other when viewed along the membrane normal. The four FdnI histidine ligands of the heme iron are provided by three of the four transmembrane helices (one histidine each by helix I and II and two histidines by helix IV). The axial heme ligands are conserved in the cytochrome *b* subunits of various formate dehydrogenases and [NiFe]-hydrogenases including the *W. succinogenes* enzymes (see [98] for an alignment). A

diheme cytochrome *b* membrane anchor with the two heme groups oriented to different sides of the membrane was also reported for the *W. succinogenes* quinol:fumarate reductase complex [99] and for the cytochrome *b* subunit of cytochrome *bc*<sub>1</sub> complexes. The same heme arrangement is also likely to apply for the membrane anchor subunit of respiratory nitrate reductase (NarI). The structure of formate dehydrogenase-N revealed a likely quinone binding site which was occupied by a HQNO molecule [94]. This site is located near the cytoplasmic surface of the membrane near the distal heme *b* group. It is therefore suggested that both heme groups are involved in electron transport and that the protons required for menaquinone reduction are taken up from the cytoplasm. Several residues that are in contact with the HQNO molecule in FdnI are conserved in the cytochrome *b* subunits of formate dehydrogenases and [NiFe]-hydrogenases [98].

The *E. coli* FdnGHI complex is anchored in the membrane by the four transmembrane domains of FdnI and by the C-terminal helix of the iron–sulfur subunit FdnH. In contrast, *W. succinogenes* FdhB is not predicted to contain the C-terminal hydrophobic segment. Instead, FdhC is predicted to span the membrane five times with segments II–V corresponding to the four segments of *E. coli* FdnI [98]. Despite the alternative ways of membrane anchoring, the catalytic sites for formate and MK as well as the connecting electron transfer pathways are expected to be essentially identical.

### 3.3. Hydrogenase

The membrane-bound [NiFe]-hydrogenase complex of *W. succinogenes* catalyzes menaquinone reduction by H<sub>2</sub> according to:

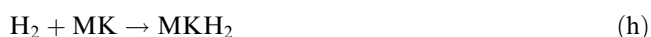

The enzyme consists of two hydrophilic (HydA and HydB) and one hydrophobic subunit (HydC) (Fig. 2) [100]. HydB carries the catalytic site of H<sub>2</sub> oxidation and HydA is predicted to contain three iron–sulfur clusters that are thought to mediate the electron transport from HydB to HydC. HydC is a membrane-bound diheme cytochrome *b* that carries the site of MK reduction [39]. The isolated trimeric enzyme catalyzed the reduction of the water-soluble MK analogue DMN by H<sub>2</sub> whereas a preparation lacking HydC did not [100]. Both forms catalyzed the reduction of viologen dyes by H<sub>2</sub>.

The subunits of the *W. succinogenes* [NiFe]-hydrogenase are encoded by the first three genes of the *hydABCDE* operon [100,101]. A *W. succinogenes* mutant that lacks the *hydABC* genes did not grow by anaerobic respiration with H<sub>2</sub> as electron donor and either fumarate or nitrate as electron acceptor [101]. Furthermore, the mutant did not contain any hydrogenase activity demonstrating that the HydABC complex is the only hydrogenase in *W. succinogenes*. The *hydD* gene product is similar to proteins

encoded by other hydrogenase operons. HydD is most likely the protease responsible for processing the C-terminus of HydB after cofactor incorporation [102]. Proteins similar to the predicted HydE protein are encoded on the genomes of *Campylobacter jejuni* [103] and *Helicobacter pylori* [104] which are close relatives of *W. succinogenes*. The function of the *hydE* gene product is unclear in any of these organisms.

*W. succinogenes* HydC is predicted to form four transmembrane domains. The sequence of HydC is similar to *W. succinogenes* FdhC and *E. coli* FdnI including the four conserved histidine residues in helices I, II and IV that axially ligate the two heme groups in FdnI [94,98]. Mutants of *W. succinogenes* lacking one of these histidine residues did not catalyze H<sub>2</sub> oxidation by DMN [105]. The mutant membranes still contained HydC and catalyzed H<sub>2</sub> oxidation by benzyl viologen.

The *W. succinogenes* HydABC complex is anchored in the membrane by both HydC and the hydrophobic C-terminus of HydA which is predicted to traverse the membrane similar to the C-terminus of *E. coli* FdnH (Fig. 2) [101]. Mutants that could synthesize only one anchor contained a catalytically active HydB that was still bound to the membrane. In the absence of both anchors, however, HydB and the activity of viologen reduction by H<sub>2</sub> were located in the periplasm. This observation strongly indicates the periplasmic orientation of HydB which is also supported by the presence of a double-arginine export sequence at the N-terminus of the HydA pre-protein. The two arginine residues were shown to be essential for the translocation of both HydA and HydB across the membrane [106]. It was proposed that a functional HydAB complex is exported by the twin-arginine-translocation (Tat) apparatus [107–109]. After its translocation, the HydAB complex might be retained in the membrane by the C-terminus of HydA before the trimeric complex with HydC is formed as the last step of hydrogenase biosynthesis. The incorporation of heme in HydC as well as the localization of HydC in the membrane were not impaired after modifying the double-arginine motif of pre-HydA [106].

A conserved histidine residue (H305) in the HydA membrane anchor was replaced by methionine [105]. The corresponding *W. succinogenes* mutant could reduce neither cytochrome *b* nor quinol by H<sub>2</sub> although the hydrogenase was found in the membrane fraction. The *W. succinogenes* mutant that lacks the membrane anchor of HydA had similar properties [101]. The simplest explanation for these results is the involvement of the HydA C-terminus in the formation of a functional complex between HydAB and HydC. H305 of HydA is conserved in *E. coli* FdnH where it is hydrogen-bonded to a conserved tyrosine residue of the cytochrome *b* subunit [94].

The crystal structures of the periplasmic hydrogenases from several *Desulfovibrio* species are known [110–112]. These enzymes consist of two hydrophilic subunits that

are similar to *W. succinogenes* HydA and HydB. The residues involved in Ni and Fe binding as well as in ligation of the three iron–sulfur clusters are conserved. Therefore, a common structure and catalytic mechanism for these hydrogenases can be assumed. The periplasmic localization or the orientation to the periplasmic side of the membrane implies that the protons derived from H<sub>2</sub> oxidation are released into the periplasm. The electrons are probably guided by the three consecutive iron–sulfur clusters to the respective electron acceptor which is a cytochrome *c* in the *Desulfovibrio* species (cf. Section 4.2.2), in contrast to the cytochrome *b* of *W. succinogenes*.

### 3.4. The coupling mechanism of respiratory nitrite ammonification

Intact cells of *W. succinogenes* grown with formate and nitrate catalyze electron transport from formate to nitrite at high rates [28]. When electron transport was started by the addition of formate and nitrite, cells were observed to take up tetraphenylphosphonium (TPP<sup>+</sup>). During the experiment, the external TPP<sup>+</sup> concentration was recorded with an ion-selective TPP<sup>+</sup> electrode. Addition of a protonophore abolished the ability to take up TPP<sup>+</sup> whereas the electron transport activity was not affected. The TPP<sup>+</sup> uptake indicated that electron transport from formate to nitrite is coupled to the generation of a membrane potential ( $\Delta\psi$ , negative inside) across the membrane. The  $\Delta\psi$  generated by the electron transport from formate to nitrite was determined as  $-160$  mV [26]. This value should be close to  $\Delta p$  because the  $\Delta pH$  across the membrane was found to be very small [113,114]. An identical  $\Delta\psi$  was obtained in an experiment with formate replaced by H<sub>2</sub> (S. Biel and J. Simon, unpublished).

The formate dehydrogenase and the NrfHA complex from *W. succinogenes* were incorporated into liposomes that also contained menaquinone isolated from the *W. succinogenes* membrane [26]. The resulting proteoliposomes catalyzed electron transport from formate to nitrite at about 0.3 mmol nitrite reduced min<sup>-1</sup> mg<sup>-1</sup> nitrite reductase. The turnover number of the nitrite reductase in the electron transport (780 electrons s<sup>-1</sup>) amounted to about 30% of that of the enzyme in growing *W. succinogenes* cells. Using the TPP<sup>+</sup> electrode, the  $\Delta\psi$  across the liposomal membrane was determined as  $-120$  mV (negative inside) [26]. Interestingly, the NrfA protein could be incorporated into liposomes even in the absence of NrfH [13]. The resulting proteoliposomes, however, did not catalyze electron transport from H<sub>2</sub> to nitrite, supporting the view that the NrfH protein is required for menaquinol oxidation by nitrite.

Proteoliposomes containing *W. succinogenes* hydrogenase, menaquinone and the NrfHA complex developed a  $\Delta\psi$  of  $-143$  mV in the steady state of electron transport from H<sub>2</sub> to nitrite (S. Biel and J. Simon, unpublished). In the absence of nitrite, these proteoliposomes catalyzed the

oxidation of H<sub>2</sub> by DMN which led to a similar  $\Delta\psi$ . DMNH<sub>2</sub> was oxidized upon the addition of nitrite but this reaction did not generate a  $\Delta\psi$  under the experimental conditions. It was shown previously that H<sub>2</sub> oxidation with DMN by *W. succinogenes* hydrogenase is coupled to  $\Delta\psi$  generation in intact cells, inverted cell vesicles or proteoliposomes [114,115]. The corresponding H<sup>+</sup>/e ratio in proteoliposomes was experimentally determined to be close to 1.0 [115]. In similar experiments formate oxidation with DMN by *W. succinogenes* formate dehydrogenase was shown to generate a  $\Delta\psi$  in cells and proteoliposomes [92,114]. Again, the corresponding H<sup>+</sup>/e ratio measured with proteoliposomes was close to 1.0 [115].

In conclusion, the results strongly suggest that the oxidation of formate or H<sub>2</sub> by menaquinone is coupled to  $\Delta p$  generation whereas menaquinol oxidation by nitrite is not (Fig. 2). This view is also supported by the localization of the quinone binding sites. MK is probably reduced near the inner side of the membrane as deduced from the similarity of both FdhC and HydC to *E. coli* FdnI (cf. Sections 3.2 and 3.3). Therefore, the protons consumed by MK reduction are most likely taken up from the cytoplasmic side. This process is coupled to the release of two protons into the periplasm upon oxidation of formate or H<sub>2</sub> thereby generating  $\Delta p$  by a so-called redox loop mechanism (Fig. 2). The quinone binding site of the NrfHA complex is expected to be near the periplasmic surface of the membrane close to the heme *c* groups as it appears unlikely that the single transmembrane domain of NrfH could accommodate a quinone binding site near the cytoplasmic membrane surface. The protons produced by MKH<sub>2</sub> oxidation are therefore thought to be liberated into the periplasm where they balance the protons consumed by nitrite reduction. The theoretical H<sup>+</sup>/e ratio for respiratory nitrite ammonification derived from this mechanism is 1.0. This is only 25% of the theoretical ratio calculated in Section 2.1. According to the hypothesis of  $\Delta p$  generation, the low efficiency is largely due to the fact that the free energy of menaquinol oxidation by nitrite is not conserved.

In fumarate respiration of *W. succinogenes*, the electron transport from formate or H<sub>2</sub> to fumarate is also coupled to  $\Delta p$  generation [39,57]. In this case, the standard redox potential at pH 7 of the electron acceptor fumarate is about 300 mV more negative than the acceptor in respiratory nitrite ammonification [ $E_0'$ (fumarate/succinate) = +0.03 V]. Nevertheless, it appears that the coupling mechanism of fumarate respiration and respiratory nitrite ammonification is principally identical. The formate dehydrogenase and hydrogenase involved are the same in both electron transport chains, but in fumarate respiration MKH<sub>2</sub> oxidation is catalyzed by fumarate reductase. The latter enzyme is a membrane-bound complex that consists of the catalytic flavoprotein FrdA, the iron–sulfur subunit FrdB and of FrdC, a diheme cytochrome *b* membrane anchor [99,116,117]. The subunits FrdA and FrdB



are oriented to the cytoplasmic side of the membrane. Using intact cells, inverted cell vesicles or proteoliposomes, fumarate reduction by menaquinol was shown to be electroneutral [114,115]. Furthermore, the  $H^+/e$  ratio for  $H_2$  oxidation by fumarate was determined as 1.0 in proteoliposomes containing hydrogenase, menaquinone and fumarate reductase [115].

#### 4. Respiratory nitrite ammonification in other proteobacteria

The components of the electron transport chain of respiratory nitrite ammonification are well known in case of the  $\epsilon$ -proteobacterium *W. succinogenes*. In contrast, the information on the corresponding electron transfer pathways in other bacteria is much more limited. As a common feature, different proteobacteria contain or encode

similar NrfA proteins (Table 2, see [20] for an alignment of NrfA sequences). In this section, these bacteria are categorized according to their proteobacterial subclass and the available data is compared to that described for *W. succinogenes* in Section 3. The following topics are discussed: (I) properties and localization of NrfA, (II) enzymology and role of electron donating enzymes such as formate dehydrogenase or hydrogenase in nitrite ammonification, (III) requirement for quinones in electron transfer from a donor substrate to nitrite and (IV) characterization of proteins involved in electron transfer from the donor substrate to the quinone pool and from the quinone pool to NrfA.

In the absence of a comprehensive characterization of these enzymes and their interaction, data obtained from genome sequencing proved to be very useful for establishing hypothetical models of the electron transport chain of respiratory nitrite ammonification in different bacteria.

Table 2  
Structural Nrf proteins predicted from corresponding genes

| Name | Organism                                                 | Residues <sup>a</sup> | Identity in % | Characteristic features          | Database accession number <sup>b</sup> |
|------|----------------------------------------------------------|-----------------------|---------------|----------------------------------|----------------------------------------|
| NrfA | <i>Wolinella succinogenes</i> ( $\epsilon$ )             | 507                   | 100           | CWTCK and 4 CXXCH motifs         | CAB53160                               |
|      | <i>Sulfurospirillum deleyianum</i> ( $\epsilon$ )        | 503                   | 75            | CWTCK and 4 CXXCH motifs         | CAB37320                               |
|      | <i>Campylobacter jejuni</i> NCTC11168 ( $\epsilon$ )     | 610                   | 31            | 5 CXXCH motifs                   | NP_282503                              |
|      | <i>Desulfovibrio vulgaris</i> Hildenborough ( $\delta$ ) | 524                   | 29            | CWNCK and 4 CXXCH motifs         | –                                      |
|      | <i>Geobacter sulfurreducens</i> ( $\delta$ )             | 490                   | 30            | CLTCK and 4 CXXCH motifs         | –                                      |
|      | <i>Carboxydotherrnus hydrogenoformans</i> (Gram+)        | 400                   | 32            | CMTCK and 4 CXXCH motifs         | –                                      |
|      | <i>Carboxydotherrnus hydrogenoformans</i> (Gram+)        | 416 <sup>c</sup>      | 33            | CMTCK and 4 CXXCH motifs         | –                                      |
|      | <i>Porphyromonas gingivalis</i> W83 (Bacteroides)        | 498                   | 45            | CWVCK and 4 CXXCH motifs         | –                                      |
|      | <i>Escherichia coli</i> ( $\gamma$ )                     | 478                   | 46            | CWSCK and 4 CXXCH motifs         | CAA51048                               |
|      | <i>Salmonella typhi</i> CT18 ( $\gamma$ )                | 478                   | 46            | CWSCK and 4 CXXCH motifs         | NP_458575                              |
|      | <i>Salmonella typhimurium</i> LT2 ( $\gamma$ )           | 478                   | 47            | CWSCK and 4 CXXCH motifs         | NP_463142                              |
|      | <i>Shewanella oneidensis</i> MR-1 ( $\gamma$ )           | 467                   | 47            | CWSCK and 4 CXXCH motifs         | –                                      |
|      | <i>Haemophilus influenzae</i> Rd KW20 ( $\gamma$ )       | 538                   | 43            | CWTCK and 4 CXXCH motifs         | NP_439227                              |
|      | <i>Pasteurella multocida</i> PM70 ( $\gamma$ )           | 510                   | 43            | CWSCK and 4 CXXCH motifs         | NP_244960                              |
| NrfB | <i>Escherichia coli</i> ( $\gamma$ )                     | 188                   | 100           | 5 CXXCH motifs                   | CAA51042                               |
|      | <i>Salmonella typhi</i> CT18 ( $\gamma$ )                | 188                   | 88            | 5 CXXCH motifs                   | NP_458576                              |
|      | <i>Salmonella typhimurium</i> LT2 ( $\gamma$ )           | 188                   | 89            | 5 CXXCH motifs                   | NP_463143                              |
|      | <i>Haemophilus influenzae</i> Rd KW20 ( $\gamma$ )       | 226                   | 42            | 5 CXXCH motifs                   | NP_439226                              |
|      | <i>Pasteurella multocida</i> PM70 ( $\gamma$ )           | 231                   | 43            | 5 CXXCH motifs                   | NP_244961                              |
| NrfC | <i>Escherichia coli</i> ( $\gamma$ )                     | 223                   | 100           | 16 conserved cysteine residues   | CAA51043                               |
|      | <i>Salmonella typhi</i> CT18 ( $\gamma$ )                | 223                   | 91            | 16 conserved cysteine residues   | NP_458577                              |
|      | <i>Salmonella typhimurium</i> LT2 ( $\gamma$ )           | 223                   | 91            | 16 conserved cysteine residues   | NP_463144                              |
|      | <i>Haemophilus influenzae</i> Rd KW20 ( $\gamma$ )       | 225                   | 63            | 16 conserved cysteine residues   | NP_439225                              |
|      | <i>Pasteurella multocida</i> PM70 ( $\gamma$ )           | 226                   | 66            | 16 conserved cysteine residues   | NP_244962                              |
| NrfD | <i>Escherichia coli</i> ( $\gamma$ )                     | 318                   | 100           | 8 conserved hydrophobic segments | CAA51044                               |
|      | <i>Salmonella typhi</i> CT18 ( $\gamma$ )                | 318                   | 86            | 8 conserved hydrophobic segments | NP_458578                              |
|      | <i>Salmonella typhimurium</i> LT2 ( $\gamma$ )           | 318                   | 86            | 8 conserved hydrophobic segments | NP_463145                              |
|      | <i>Haemophilus influenzae</i> Rd KW20 ( $\gamma$ )       | 321                   | 49            | 8 conserved hydrophobic segments | NP_439224                              |
|      | <i>Pasteurella multocida</i> PM70 ( $\gamma$ )           | 319                   | 52            | 8 conserved hydrophobic segments | NP_244963                              |
| NrfH | <i>Wolinella succinogenes</i> ( $\epsilon$ )             | 177                   | 100           | 4 CXXCH motifs; NapC homologue   | CAB53159                               |
|      | <i>Sulfurospirillum deleyianum</i> ( $\epsilon$ )        | 177                   | 68            | 4 CXXCH motifs; NapC homologue   | CAD19316                               |
|      | <i>Campylobacter jejuni</i> NCTC11168 ( $\epsilon$ )     | 171                   | 36            | 4 CXXCH motifs; NapC homologue   | NP_282504                              |
|      | <i>Desulfovibrio vulgaris</i> ( $\delta$ )               | 159                   | 23            | 4 CXXCH motifs; NapC homologue   | –                                      |
|      | <i>Geobacter sulfurreducens</i> ( $\delta$ )             | 154                   | 31            | 4 CXXCH motifs; NapC homologue   | –                                      |
|      | <i>Carboxydotherrnus hydrogenoformans</i> (Gram+)        | 137                   | 36            | 4 CXXCH motifs; NapC homologue   | –                                      |
|      | <i>Porphyromonas gingivalis</i> W83 (Bacteroides)        | 203                   | 43            | 4 CXXCH motifs; NapC homologue   | –                                      |

<sup>a</sup>The size of the NrfA pre-proteins is given. In case of alternative start codons the most likely translational start site is considered.

<sup>b</sup>Primary protein sequences derived from preliminary genome sequences are not referenced.

<sup>c</sup>Denotes the protein predicted by the *C. hydrogenoformans nrfA2* gene (Table 3).



The organization of bacterial *nrf* loci is presented in Table 3 (see also Section 5). As the most notable result, the *nrfHA* arrangement is found in proteobacteria belonging to the  $\epsilon$ - and  $\delta$ -subclasses (Sections 4.1 and 4.2) as well as in two non-proteobacteria, the bacteroid *Porphyromonas gingivalis* and the thermophilic Gram-positive *C. hydrogenoformans*. Thus, a NrfHA complex similar to that of *W. succinogenes* is predicted to be present in many different bacteria. Members of the  $\gamma$ -proteobacteria appear to be exceptional since it was proposed that the pathway of electron transfer from the quinone pool to NrfA is independent of a NrfH-like protein (Section 4.3).

#### 4.1. $\epsilon$ -Proteobacteria

The free-living bacterium *S. deleyianum* is similar to *W. succinogenes* in many physiological aspects (Table 1) [49]. NrfA of *S. deleyianum* was the first cytochrome *c* nitrite reductase whose crystal structure was determined [19]. The NrfA sequences from *W. succinogenes* and *S. deleyianum* are very similar (75% identity) including the five heme binding motifs and conserved residues near the active site that are thought to be involved in catalysis (Table 2). The three-dimensional structures of the two enzymes are nearly identical with respect to the location of the five heme groups, the substrate and product channels and the architecture of the catalytic site [20]. Furthermore, the catalytic properties and EPR spectra of both NrfA pro-

teins were found to be nearly identical [14,29,67]. *S. deleyianum* NrfA is found in the periplasm as well as in the membrane fraction where it forms a NrfHA complex similar to that of *W. succinogenes* [14]. The NrfH proteins of the two bacteria share 68% identical residues (Fig. 4 and Table 2). Both organisms contain a *nrfHAIJ* locus on the genome (Table 3) [20]. It is likely that the coupling mechanism of *S. deleyianum* respiratory nitrite ammonification is the same as in *W. succinogenes* although little is known about *S. deleyianum* formate dehydrogenase or [NiFe]-hydrogenase [46]. It is expected that the latter two enzymes are also highly similar to those of *W. succinogenes*.

Among members of the genus *Campylobacter*, only *C. sputorum* biovar *bubulus* was shown to grow by respiratory nitrite ammonification (Table 1) [47]. It was proposed that the electron transport chain from formate to nitrite is similar to that depicted for *W. succinogenes* in Fig. 2. [48]. Bacterial electron transport was shown to be coupled to proton translocation and the corresponding  $H^+/e$  ratio was estimated to be 1.0 [48]. When grown with lactate instead of formate as electron donor, the growth yield of *C. sputorum* biovar *bubulus* per mol nitrite was increased by a factor of 2.6 indicating additional ATP synthesis by substrate level phosphorylation [47]. The NrfA protein from *C. sputorum* biovar *bubulus* was not isolated and the corresponding gene was not sequenced.

The membrane fraction of *C. jejuni* NCTC 11168 catalyzes nitrite reduction by benzyl viologen radical with a

Table 3  
Organization of *nrf* genes and corresponding system of cytochrome *c* biogenesis

| Organism <sup>a</sup>                                    | <i>nrf</i> locus                                        | Cytochrome <i>c</i> biogenesis | Dissimilatory nitrate reductase |
|----------------------------------------------------------|---------------------------------------------------------|--------------------------------|---------------------------------|
| <i>Wolinella succinogenes</i> ( $\epsilon$ )             | <i>nrfHAIJ</i>                                          | system II <sup>f</sup>         | Nap <sup>g</sup>                |
| <i>Sulfurospirillum deleyianum</i> ( $\epsilon$ )        | <i>nrfHAIJ</i>                                          | system II <sup>f</sup>         | n.r.                            |
| <i>Campylobacter jejuni</i> NCTC 11168 ( $\epsilon$ )    | <i>nrfHA</i> <sup>b</sup>                               | system II                      | Nap                             |
| <i>Desulfovibrio vulgaris</i> Hildenborough ( $\delta$ ) | <i>nrfHA</i>                                            | system II                      | Nap                             |
| <i>Geobacter sulfurreducens</i> ( $\delta$ )             | <i>nrfHA</i>                                            | system II                      | ? <sup>h</sup>                  |
| <i>Porphyromonas gingivalis</i> W83 (Bacteroidaceae)     | <i>nrfHAKLM</i>                                         | system II                      | n.p.                            |
| <i>Carboxydotherrmus hydrogenoformans</i> (Gram+)        | <i>nrfHA</i> and <i>nrfA2</i> <sup>c</sup>              | system II                      | ? <sup>h</sup>                  |
| <i>Escherichia coli</i> ( $\gamma$ )                     | <i>nrfABCDEFG</i>                                       | system I                       | Nap/Nar                         |
| <i>Salmonella typhi</i> CT18 ( $\gamma$ )                | <i>nrfABCDEFG</i>                                       | system I                       | Nap/Nar                         |
| <i>Salmonella typhimurium</i> LT2 ( $\gamma$ )           | <i>nrfABCDEFG</i> <sup>d</sup>                          | system I                       | Nap/Nar                         |
| <i>Shewanella oneidensis</i> MR-1 ( $\gamma$ )           | <i>nrfA</i>                                             | system I                       | Nap                             |
| <i>Haemophilus influenzae</i> Rd KW20 ( $\gamma$ )       | <i>nrfABCD</i> and <i>nrfE-ccmG2-nrfFG</i> <sup>e</sup> | system I                       | Nap                             |
| <i>Pasteurella multocida</i> PM70 ( $\gamma$ )           | <i>nrfABCDE-ccmG2-nrfFG</i>                             | system I                       | Nap                             |

The data are compiled from published genome sequences [103,118–121] or from searchable preliminary genome sequences presented on the website of The Institute for Genomic Research (TIGR). Genomes were searched using the BLAST algorithm and the following queries: NrfA from *W. succinogenes* and *E. coli*, CcmE and CcmH from *E. coli* [64], CcsA from *Mycobacterium leprae* [122], CcdA from *Bacillus subtilis* [123], NarG and NapA from *E. coli* [82].

n.r.: not reported; n.p.: not present on the genome.

<sup>a</sup>The phylogenetic classification of the bacteria is denoted in parentheses; for proteobacteria the corresponding subclass is given.

<sup>b</sup>The predicted NrfA protein contains five CXXCH motifs.

<sup>c</sup>The genome sequence of *C. hydrogenoformans* reveals a second copy of *nrfA*, named *nrfA2* here, which is not accompanied by a copy of *nrfH*. The predicted NrfA2 protein is 50% identical to *C. hydrogenoformans* NrfA including the conserved CMTCK motif.

<sup>d</sup>The *S. typhimurium* *nrfE* and *nrfF* genes are fused in one open reading frame.

<sup>e</sup>The *H. influenzae* *nrfF* and *nrfG* genes are fused in one open reading frame.

<sup>f</sup>The classification is based on the similarity of NrfI to various CcsA proteins.

<sup>g</sup>R. Gross and J. Simon, unpublished.

<sup>h</sup>Presence not known since the genome sequence was in a too preliminary state at the time of writing this article.

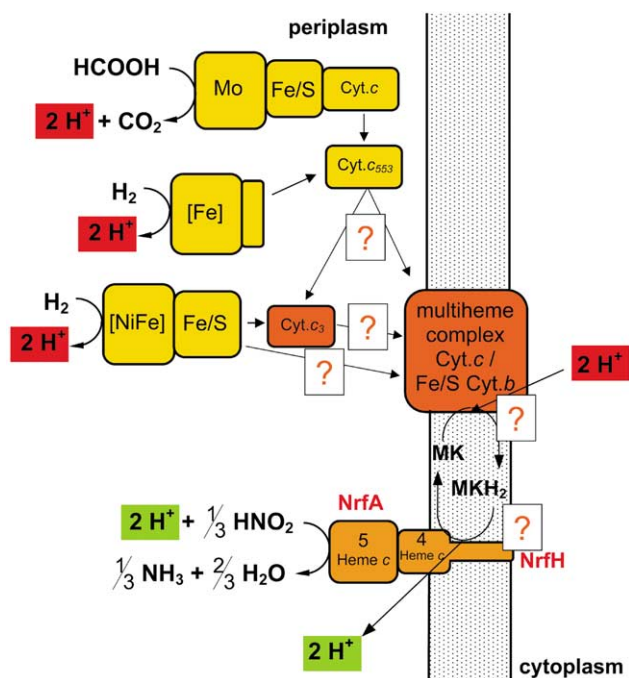

Fig. 5. Hypothetical electron transport chains from formate or  $H_2$  to nitrite in *D. desulfuricans*. Note that the figure is based on results obtained with different strains of *D. desulfuricans* (see text). The membrane-bound cytochrome *c* complex is designated 'Hmc' in *D. desulfuricans* Essex and '9Hc' in *D. desulfuricans* ATCC 27774. Question marks denote speculative reactions or protein interactions. Further explanations are given in the legend of Fig. 2.

higher specific activity than that of *W. succinogenes* (R. Gross and J. Simon, unpublished). The *nrfA* gene of *C. jejuni* NCTC 11168 is located immediately downstream of a *nrfH* homologue (Table 3 and Fig. 4) as seen from the genome sequence [103]. Surprisingly, the predicted NrfA sequence of *C. jejuni* contains a CXXCH motif instead of the CXXCK motif although the overall sequence is similar to those of *W. succinogenes* and *S. deleyianum* (Table 2). The *C. jejuni* genome also contains two gene clusters that are highly similar to the *W. succinogenes* *hyd* and *fdh* operons suggesting the existence of electron transport chains similar to those shown in Fig. 2 [103].

#### 4.2. $\delta$ -Proteobacteria

Within the  $\delta$ -proteobacteria, respiratory nitrite ammonification was shown only for *D. desulfuricans* and *D. gigas* (Table 1). Proton translocation was shown to be coupled to electron transport from formate or  $H_2$  to nitrite in *D. desulfuricans* (Table 1) [24]. Furthermore, electron transport from  $H_2$  to nitrite in *D. gigas* was reported to develop a  $\Delta p$  and to drive ATP synthesis [25]. The  $H^+/e^-$  ratio for nitrite reduction by  $H_2$  was experimentally determined as approximately 1.0 for both *D. desulfuricans* and *D. gigas* [24,25]. A model electron transport chain from formate or  $H_2$  to nitrite in *D. desulfuricans* is depicted in

Fig. 5. The presence of a membrane-bound NrfHA complex is suggested in different *Desulfovibrio* species (Section 4.2.1). The hypothetical chain of electron transport from formate dehydrogenase or hydrogenase to the nitrite reductase is the subject of Section 4.2.2.

##### 4.2.1. Cytochrome *c* nitrite reductase

The activity of nitrite reduction by reduced viologen dyes was found exclusively in the membrane fraction of *Desulfovibrio* spp. [29,76]. In contrast, at least part of the activity is located in the periplasm in proteobacteria of the  $\epsilon$ - or  $\gamma$ -subclass. The nitrite ammonifying enzyme (NrfA, 66 kDa) was purified from the membrane fraction of *D. desulfuricans* ATCC 27774 and proved to be a cytochrome *c* nitrite reductase [11,50,71]. The enzyme was reported to be membrane-bound and was proposed to carry six heme *c* groups as concluded from EPR and Mössbauer spectroscopy (see [31] for review). However, the enzyme used for Mössbauer spectroscopy [73,74] showed the low-field EPR signal at  $g=4.8$  indicative of the NrfHA complex of both *W. succinogenes* and *S. deleyianum*. Therefore, the presence of a multi-heme NrfHA complex in the *D. desulfuricans* membrane could not be excluded [74]. Indeed, *D. desulfuricans* NrfA was purified in a complex with another *c*-type cytochrome of 19 kDa [75] which is probably a homologue of the NrfH proteins found in the  $\epsilon$ -proteobacteria (Fig. 5). This situation is reminiscent of the initial purification attempts of the membrane-bound nitrite reductase from *W. succinogenes* where NrfH was lost during enrichment of NrfA [13]. Unfortunately, the genes encoding the *D. desulfuricans* nitrite reductase complex have not yet been reported but it is likely that they will encode typical NrfA and NrfH proteins. As crystals of the *D. desulfuricans* cytochrome *c* nitrite reductase have been reported [124], hopefully, this point will be clarified upon structure determination.

Recently, a two-subunit nitrite reductase complex was purified from the membrane fraction of *D. vulgaris* Hildenborough [76], an organism that contains a *nrfHA* gene cluster on the genome (Table 3). The small subunit of this complex was identified as the NrfH protein by comparison of the reported N-terminus [76] to that predicted by the *nrfH* gene (Fig. 4). The *D. vulgaris* *nrfH* and *nrfA* genes predict a tetraheme and a pentaheme cytochrome *c*, respectively (Table 2). The deduced sequence of NrfA contains the conserved CXXCK motif. A similar *nrfHA* locus was also revealed by sequencing the genome of the  $\delta$ -proteobacterium *Geobacter sulfurreducens* (Tables 2 and 3).

It is not known why cells of different *Desulfovibrio* species synthesize NrfA during sulfate respiration in the absence of nitrite [51,60,76]. This is even more surprising in the light of the fact that *D. vulgaris* Hildenborough did not grow upon nitrite reduction with either lactate or formate as electron donor [76]. A possible explanation, beside a function in nitrite detoxification, would be that NrfA serves in periplasmic sulfite reduction. Cytochrome *c* ni-

trite reductase catalyzes the reduction of sulfite to sulfide (reaction i), which is a six-electron reaction isoelectronic to nitrite ammonification (Eq. a):

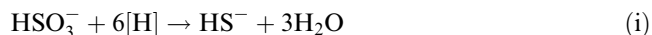

In fact, the NrfHA complex of *D. desulfuricans* was isolated by enrichment of the sulfite reductase activity from the membrane fraction [75]. The activity was determined with methylviologen as electron donor which was reduced by  $\text{H}_2$  in the presence of hydrogenase. The specific activity of the purified NrfHA complex ( $2 \mu\text{mol H}_2$  oxidized  $\text{min}^{-1} \text{mg protein}^{-1}$ ) was even higher than that of the cytoplasmic siroheme sulfite reductase [125]. Sulfite reductase activity was also reported for the NrfHA complex from *D. vulgaris* [76] and for *S. deleyianum* NrfA [67]. In all cases, the specific activity with sulfite was less than 0.5% of that with nitrite [67,75,76]. The physiological function of periplasmic sulfite reduction is not clear since it is not considered to be involved in  $\Delta p$  generation or ATP synthesis.

#### 4.2.2. The electron transport chain from formate or $\text{H}_2$ to nitrite

The presence of a NrfHA complex in *Desulfovibrio* spp. makes it plausible that a respiratory quinone like menaquinone-6 (Table 1) is involved in electron transfer to nitrite, although this has not been demonstrated experimentally (Fig. 5). As in *W. succinogenes*, the NrfH protein is expected to function as the menaquinol oxidizing subunit in the electroneutral oxidation of menaquinol by nitrite. If true,  $\Delta p$  has to be generated upon menaquinone reduction by either  $\text{H}_2$  or formate (Fig. 5). Hydrogenase and formate dehydrogenase were described as periplasmic enzymes in *D. desulfuricans* and *D. gigas* [24,53]. Unfortunately, the electron transport from hydrogenase or formate dehydrogenase to the quinone pool is essentially unclear in *Desulfovibrio* spp., largely due to the fact that menaquinone is assumed not to be a constituent of the electron transport chain from  $\text{H}_2$  or formate to sulfate.

Within the genus *Desulfovibrio* various [NiFe]-, [Fe]- or [NiFeSe]-hydrogenases were described which are located either in the periplasm, in the membrane or in the cytoplasm [126,127]. The crystal structure of the periplasmic [NiFe]-hydrogenase from *D. desulfuricans* ATCC 27774 was determined recently [112]. The enzyme is a heterodimer of two subunits (62 kDa and 27 kDa) that are similar to those of other [NiFe]-hydrogenases (cf. Section 3.3). The low-potential tetraheme cytochrome  $c_3$  is thought to interact with the *D. desulfuricans* [NiFe]-hydrogenase and to receive electrons from the distal [4Fe-4S] cluster of the small hydrogenase subunit [112,128–130]. A further known structure is that of the periplasmic [Fe]-hydrogenase from *D. desulfuricans* ATCC 7757 [131]. This enzyme also consists of two subunits but the active site is unrelated to that of the [NiFe]-hydrogenase. It was suggested that the [Fe]-hydrogenase transfers electrons to the periplasmic monoheme cytochrome  $c_{553}$  [132].

Intact cells of several *Desulfovibrio* species catalyze nitrite reduction by formate at a rather low rate of less than  $20 \text{ nmol nitrite reduced min}^{-1} (\text{mg dry cell wt})^{-1}$  [60]. Periplasmic formate dehydrogenases were isolated from *D. desulfuricans* ATCC 27774 [133] and *D. vulgaris* Hildenborough [134,135]. The enzymes from both organisms consist of a molybdenum-containing catalytic subunit, an iron-sulfur protein and a *c*-type cytochrome (Fig. 5). The first two proteins are similar to *W. succinogenes* FdhA and FdhB (Section 3.2). The diheme cytochrome *b* (FdhC) of *W. succinogenes* seems to be replaced by a cytochrome *c* subunit as electron acceptor. The *fdh* gene cluster from *D. vulgaris* Hildenborough is known from genome sequencing by The Institute for Genomic Research. It encodes the three subunits of formate dehydrogenase, as revealed by comparison of the predicted primary sequences to the reported N-termini [134]. The cytochrome *c* subunit contains four heme *c* binding motifs, in contrast to the biochemical characterization of this protein where only one heme *c* per peptide chain was determined [134]. The cytochrome *c* subunit of the *D. desulfuricans* formate dehydrogenase was reported to be a tetraheme cytochrome *c* [133]. The trimeric formate dehydrogenase of *D. vulgaris* is thought to interact with the periplasmic cytochrome  $c_{553}$  [135,136].

The subsequent electron transport from the *c*-type cytochromes to the quinone pool is not known. In the case of *D. desulfuricans* it was suggested that the electrons are eventually transferred to a putative membrane-bound multiheme cytochrome complex which was postulated to consist of four subunits (Fig. 5) [137]. The initial electron acceptor is thought to be a nonheme cytochrome *c* that is encoded by the *9hcA* gene in *D. desulfuricans* ATCC 27774 and whose crystal structure is known [138–140]. Further subunits of the complex might be encoded by the adjacent *9hcB–D* genes that predict an iron-sulfur protein, a possible diheme cytochrome *b* and a hydrophobic protein of unknown function, respectively [137]. One can speculate that the latter two proteins may function in menaquinone reduction thus making electrons available for nitrite reduction (Fig. 5). In *D. desulfuricans* Essex, the nonheme cytochrome *c* was reported to interact directly with the [NiFe]-hydrogenase without the mediation of cytochrome  $c_3$  [141,142]. This observation is supported by the fact that a cytochrome  $c_3$  mutant of *D. desulfuricans* G20 was not affected in growth with  $\text{H}_2$  and sulfate [143].

The function of the *D. desulfuricans* 9hc complex may be carried out by the putative Hmc complex in *D. vulgaris* Hildenborough and *D. gigas* [144,145]. HmcA is a high-molecular-mass cytochrome with 16 heme *c* moieties, HmcB and HmcF are predicted to be iron-sulfur proteins while the function of the hydrophobic membrane proteins HmcC, HmcD and HmcE is not known. As suggested by the phenotype of a corresponding deletion mutant, the Hmc complex is involved in electron transport from  $\text{H}_2$

to sulfate [146]. However, cells of the *hmc* mutant were not examined for electron transport to nitrite.

#### 4.3. $\gamma$ -Proteobacteria

Nitrite ammonification is widespread in  $\gamma$ -proteobacteria [147]. However, the corresponding enzymes or the capability of respiratory nitrite ammonification were characterized in only a few cases. Cytochrome *c* nitrite reductases (NrfA) with similar properties were isolated from the soluble cell fractions of *E. coli* (Section 4.3.1), *Vibrio fischeri* [15,16] and *Vibrio alginolyticus* [148]. Putative *nrfA* genes were identified in several  $\gamma$ -proteobacterial genomes (Table 3, see also Section 5).

##### 4.3.1. The cytochrome *c* nitrite reductase of *E. coli*

*E. coli* NrfA (cytochrome *c*<sub>552</sub>) was isolated from the soluble cell fraction [8–10] but minor amounts were also identified in the membrane fraction [21,149]. The periplasmic cytochrome *c*<sub>552</sub> was described in the early 1960s [150] and was suggested to function as a nitrite reductase as the reduced heme *c* in the protein was oxidized by nitrite [151–153]. It is now clear that NrfA is a pentaheme *c*-type cytochrome which is synthesized as a pre-protein with a signal peptide of 26 or 33 amino acid residues [17,18,21]. The covalent attachment of heme to the conserved CXXCK motif was first demonstrated for *E. coli* NrfA [18]. The crystal structure of *E. coli* NrfA was determined recently [21] and was found to be essentially identical to those of the NrfA proteins from *W. succinogenes* and *S. deleyianum*. *E. coli* NrfA contains all characteristic features discussed in Section 3.1.1 for *W. succinogenes* NrfA, although the primary sequences of these two NrfA proteins share only 46% identical residues (Table 2). It is notable, however, that *W. succinogenes* NrfA more closely resembles any  $\gamma$ -proteobacterial NrfA than NrfA of the fellow  $\epsilon$ -proteobacterium *C. jejuni* (Table 2).

Replacement of the lysine ligand of the active site heme group in *E. coli* NrfA resulted in a mutant protein with lowered nitrite reductase activity measured with methyl viologen radical as electron donor [18]. Similar results were obtained for *W. succinogenes* NrfA (cf. Section 3.1.1). As in the  $\epsilon$ -proteobacterial NrfA proteins, heme 2 of *E. coli* NrfA was favored as the entry point for electrons donated by its partner cytochrome *c* (cf. Section 4.3.2) although its solvent accessibility is lower and the electropositive patch in the vicinity of heme 2 is less pronounced in the *E. coli* protein [21]. Optical and EPR spectra of *E. coli* NrfA are similar to those of the NrfA protein from the soluble cell fraction of *W. succinogenes* or *S. deleyianum* [21,66].

During anaerobic growth in the presence of nitrite, *E. coli* produces a second nitrite ammonifying enzyme (NirBD) that is regulated differently from NrfA [4,154,155]. NirBD is a cytoplasmic NADH-dependent nitrite reductase that is responsible for more than 80% of the

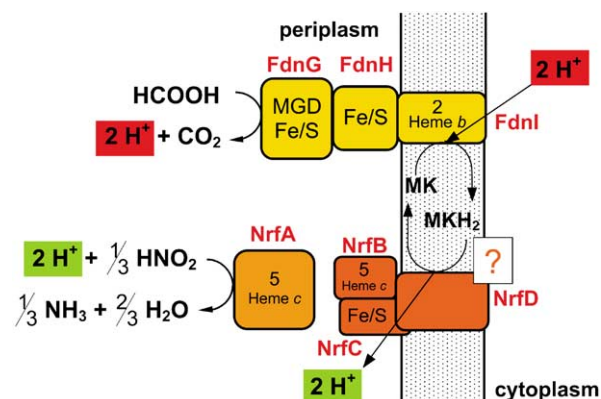

Fig. 6. Enzyme complexes involved in electron transport from formate to nitrite in *E. coli*. The question mark indicates that the quinol-oxidizing NrfBCD complex is hypothetical. Note that demethylmenaquinone can functionally replace MK. Further explanations are given in the legend of Fig. 2.

total nitrite reductase activity while the residual activity is catalyzed by NrfA [23,83,147]. NirB is an iron–sulfur protein that also carries FAD and a siroheme cofactor [156]. The function of NirBD was assigned primarily to detoxification of nitrite which is produced by the cytoplasmically oriented membrane-bound nitrate reductase complex (NarGHI) [4]. The NirBD enzyme is not regarded as a respiratory enzyme as energy is apparently not conserved during nitrite reduction by NADH [7,23].

##### 4.3.2. Electron transport to NrfA in *E. coli*

NrfA was initially thought to be involved in nitrite reduction by formate thus establishing the abbreviation ‘nrf’ [147,157,158]. At minor rates, pyruvate, ethanol, glucose and lactate were also reported to serve as electron donors for NrfA [23,147,158,159]. Under anaerobic conditions, formate is readily formed from pyruvate by pyruvate formate lyase. Growth of *E. coli* cells with formate and nitrite as sole energy substrates has not been reported and the activity of nitrite reduction by formate was measured to be below  $0.1 \mu\text{mol nitrite reduced min}^{-1} (\text{mg dry cell wt})^{-1}$  [147,157,159]. Nevertheless, ‘formate-dependent nitrite ammonification’ was shown to be coupled to the generation of a membrane potential in intact *E. coli* cells [22,23]. Nitrite reduction by formate is observed only with intact cells. The loss of activity after cell disruption can be explained by the fact that NrfA is primarily located in the periplasmic space. The requirement for naphthoquinones (demethylmenaquinone and/or menaquinone) for electron transport from formate to nitrite has been demonstrated [27]. The involvement of any of the at least three *E. coli* hydrogenases in the Nrf pathway has not yet been shown.

The hypothetical electron transport chain from formate to nitrite of *E. coli* is shown in Fig. 6. The main difference from *W. succinogenes* (Fig. 2) is the electron transfer pathway from quinol to NrfA which was proposed not to involve a cytochrome of the NapC/NirT family [160]. *E. coli* NrfA is encoded by the first gene of the *nrfA-G* gene



cluster [17,160] which does not contain a *nrfH* homologue. Furthermore, all members of the NapC/NirT family encoded on the *E. coli* genome (NapC, TorC and TorY) are probably not involved in electron transport to NrfA as their genes are organized in clusters that encode catalytic subunits of other electron transport enzymes involved in anaerobic respiration, i.e. periplasmic nitrate reductase or TMAO reductase [161–163]. Instead, the products of the *nrfB*, *C* and *D* genes might carry out the function of NrfH in *E. coli* but neither this function nor any interaction of the NrfA, B, C and D proteins has been experimentally demonstrated so far. The NrfB sequence contains five CXXCH motifs and the corresponding protein was therefore predicted to be a pentaheme cytochrome *c* (23.8 kDa). The sequence of NrfB is unrelated to any NrfH sequence. NrfB was detected by heme staining of *E. coli* proteins after SDS-PAGE [164] and was found to be membrane-associated [149]. The hydrophobic N-terminus of NrfB might function either as a membrane anchor or as a signal peptide [160]. NrfC (24.5 kDa) is likely to be a Fe/S protein as it contains 16 cysteine residues that are conserved in various Fe/S proteins involved in electron transport of anaerobic respiration [160]. NrfC was thought to be a membrane-bound protein [160] although the presence of a double-arginine motif might suggest a periplasmic localization [83]. NrfD (37 kDa) is predicted to be a membrane-bound protein with eight transmembrane traversions. It is similar to PsrC, the membrane anchor of the *W. succinogenes* polysulfide reductase complex (PsrABC) that is thought to bind MMK-6 [165]. Assuming a membrane-bound NrfBCD complex (Fig. 6), NrfB might be the direct electron donor to NrfA with NrfC as an electron mediator and NrfD as the naphthoquinol oxidase. Protons

obtained upon quinol oxidation by nitrite are thought to be liberated into the periplasmic space where they balance the protons taken up in the course of nitrite reduction. It cannot be excluded, however, that NrfD is a proton pump, in contrast to *W. succinogenes* NrfH. The *nrfE*, *F* and *G* gene products of *E. coli* are not considered to be involved in electron transfer to cytochrome *c* nitrite reductase. The corresponding gene products are discussed in Section 6. Differences in the enzyme surface in the vicinity of heme 2 of NrfA might indicate whether a NrfA protein interacts with a NrfB or a NrfH protein. In fact, *E. coli* NrfA contains a striking seven residue insertion (residues 169–175 in the pre-protein) located near the heme 2 binding motif (residues 160–164) and the putative docking region with NrfB [21]. This insertion is conserved in NrfA sequences of *nrfB*-containing organisms whereas it appears to be absent in those with a *nrfH* gene [20,21].

*E. coli* contains three different formate dehydrogenases (see [166] for review). All three enzymes were reported to donate electrons into the Nrf pathway as suggested from the rates of nitrite reduction by formate in intact cells of appropriate formate dehydrogenase mutants [167]. Formate dehydrogenase-N (FdnGHI) is the predominant formate dehydrogenase under anaerobic conditions in the presence of nitrate in the mM range (Fig. 6) [167]. The enzyme is oriented to the periplasm and its high-resolution structure is known (cf. Section 3.2) [94,168]. Formate dehydrogenase-N catalyzes the reduction of respiratory naphthoquinones which is coupled to apparent proton translocation across the membrane by a redox-loop mechanism (Fig. 6) [98,169]. Notably, formate dehydrogenase-N might also reduce ubiquinone which, to a minor extent, is present in anaerobically grown *E. coli* cells. However,

Table 4  
Accessory Nrf proteins predicted from the corresponding genes

| Name | Organism                                          | Residues | Identity in % | Characteristic feature | Database accession number <sup>a</sup> |
|------|---------------------------------------------------|----------|---------------|------------------------|----------------------------------------|
| NrfI | <i>Wolinella succinogenes</i> (ε)                 | 902      | 100           | W-rich motif: WGRYAWWD | CAB53161                               |
| NrfJ | <i>Wolinella succinogenes</i> (ε)                 | 217      | 100           |                        | CAB53162                               |
| NrfE | <i>Escherichia coli</i> (γ)                       | 552      | 100           | W-rich motif: WGGWWFWD | NP_418498                              |
|      | <i>Salmonella typhi</i> CT18 (γ)                  | 578      | 78            | W-rich motif: WGGWWFWD | NP_458579                              |
|      | <i>Salmonella typhimurium</i> LT2 (γ)             | 740      | 78            | W-rich motif: WGGWWFWD | NP_463146                              |
|      | <i>Haemophilus influenzae</i> Rd KW20 (γ)         | 635      | 41            | W-rich motif: WGGWWFWD | NP_439096                              |
|      | <i>Pasteurella multocida</i> PM70 (γ)             | 641      | 44            | W-rich motif: WGGWWFWD | NP_244964                              |
| NrfF | <i>Escherichia coli</i> (γ)                       | 127      | 100           |                        | NP_418499                              |
|      | <i>Salmonella typhi</i> CT18 (γ)                  | 170      | 74            |                        | NP_458580                              |
|      | <i>Salmonella typhimurium</i> LT2 (γ)             | 740      | 74            | NrfF is fused to NrfE  | NP_463146                              |
|      | <i>Haemophilus influenzae</i> Rd KW20 (γ)         | 384      | 49            |                        | NP_439094                              |
|      | <i>Pasteurella multocida</i> (γ)                  | 161      | 47            |                        | NP_244966                              |
| NrfG | <i>Escherichia coli</i> (γ)                       | 198      | 100           |                        | CAA51047                               |
|      | <i>Salmonella typhi</i> CT18 (γ)                  | 206      | 69            |                        | NP_458581                              |
|      | <i>Salmonella typhimurium</i> LT2 (γ)             | 206      | 70            |                        | NP_463147                              |
|      | <i>Haemophilus influenzae</i> Rd KW20 (γ)         | 384      | 30            | NrfG is fused to NrfF  | NP_439094                              |
|      | <i>Pasteurella multocida</i> (γ)                  | 278      | 36            |                        | NP_244967                              |
| NrfK | <i>Porphyromonas gingivalis</i> W83 (Bacteroides) | 208      | –             |                        | –                                      |
| NrfL | <i>Porphyromonas gingivalis</i> W83 (Bacteroides) | 238      | –             |                        | –                                      |
| NrfM | <i>Porphyromonas gingivalis</i> W83 (Bacteroides) | 271      | –             | W-rich motif: WGTYWNWD | –                                      |

<sup>a</sup>Primary protein sequences derived from preliminary genome sequences are not referenced.

ubiquinol apparently does not serve as electron donor to NrfA [27].

The membrane-bound formate dehydrogenase-O is expressed constitutively but at a low level [4]. It is under debate whether the catalytic site of this enzyme is oriented to the cytoplasm or to the periplasm [168,170]. Formate dehydrogenase-H is part of the cytoplasmic formate hydrogen lyase which is repressed by the presence of nitrate. The electron transfer pathway from formate dehydrogenase-H to NrfA is essentially unclear but is assumed not to contribute to  $\Delta p$  generation [167].

## 5. Organization of *nrf* genes

Table 3 summarizes the organization of bacterial *nrf* loci. The deduced primary sequences are compared in Tables 2 and 4. Many of the Nrf proteins are only predicted from genome sequences. All *nrfH* genes are located upstream of *nrfA* homologs (cf. Section 4). The capability of nitrite ammonification by the *nrfH*-containing non-proteobacteria *P. gingivalis* and *C. hydrogenoformans* has not yet been examined. In Gram-positive bacteria, *c*-type cytochromes are always anchored to the membrane with their hydrophilic parts facing the outside of the cell. It is therefore not surprising to find the *nrfHA* genes in the Gram-positive bacterium *C. hydrogenoformans* rather than the *nrfABCD* arrangement. The *nrfABCD* genes form a conserved entity that appears to be restricted to  $\gamma$ -proteobacteria (Table 3). An exception is the *nrfA* gene of *Shewanella oneidensis* MR-1 (formerly *S. putrefaciens*) that seems not to be organized in a polycistronic operon. The electron transfer pathway to NrfA in this organism remains to be elucidated. The corresponding genome contains separated *nrfC* and *nrfD* homologs and also encodes a variety of *c*-type cytochromes including a member of the NapC/NirT family, the *cymA* gene product (Fig. 4) [85,171] which was shown to be essential for various modes of anaerobic respiration including nitrate respiration [171,172]. The *cymA* gene is also not part of a gene cluster. The open reading frames downstream of the *nrfHA* or *nrfABCD* modules as shown in Table 3 are discussed in the following section as they are considered to function in NrfA biogenesis.

## 6. Heme attachment to NrfA

All NrfA proteins are expected to be similar cytochromes and most of them are considered to contain the lysine-ligated active site heme *c* group. A complex cytochrome *c* biogenesis apparatus is required for the maturation of bacterial *c*-type cytochromes for which, depending on the organism, two completely different systems (named system I and II) emerged in recent years [173]. Evidence was provided that both systems can serve in heme attach-

ment to CXXCH motifs of NrfA but neither system serves in the attachment of the CXXCK-bound active site heme group. This holds true for the system I organism *E. coli* [18] as well as for the system II organism *W. succinogenes* [63]. Instead, at least some of the open reading frames that follow the structural *nrf* genes in  $\epsilon$ - or  $\gamma$ -proteobacteria (*nrfIJ* or *nrfEFG*; Table 3) were shown to be specifically required for heme attachment to CXXCK. Some properties of these accessory *nrf* gene products are compared in Table 4.

The biogenesis of *c*-type cytochromes minimally comprises the following steps: (1) transport of apo-cytochrome and of heme across the membrane, as *c*-type cytochromes are typically located either in the periplasm or at the outer aspect of the membrane [64], (2) maintaining the cysteine residues of the heme binding motif in a reduced state, (3) the covalent attachment of heme catalyzed by a cytochrome *c* heme lyase. Several gene loci were identified that are involved in the synthesis of *c*-type cytochromes in different bacteria and their classification led to the establishment of system I and system II of cytochrome *c* biogenesis [173,174]. According to the nomenclature of Kranz and co-workers [173], *E. coli* is prototypic for system I in containing the *ccmA–H* locus (Table 3). System I is found in  $\alpha$ - and  $\gamma$ -proteobacteria, in plant and protozoal mitochondria and in various archaea. Components of system II are the *ccsA*, *ccsB*, *ccsX* and *cedA* gene products [175] which share no overall similarity to any of the *ccm* gene products. System II is present in members of the  $\beta$ -,  $\delta$ - and  $\epsilon$ -proteobacteria, in several Gram-positive bacteria, in the cyanobacterium *Synechocystis* sp. PCC 6803 as well as in chloroplasts. Every gene product of both systems is predicted to be membrane-bound and proved to be essential for the synthesis of each *c*-type cytochrome of the respective organism. The only similarity between proteins that belong to different systems is a short tryptophan-rich stretch (consensus motif WG $X\phi$ WXWD with  $\phi$  representing an aromatic residue; Table 4) together with a couple of conserved histidine residues. These features are present in CcmC, CcmF and NrfE (system I) as well as in CcsA and NrfI (system II) [18,63,173,176]. The tryptophan-rich motif was suggested to play a role in either heme export and/or in heme delivery to the heme lyase [122,176].

An *E. coli* mutant unable to produce NrfE, F and G was found to synthesize an inactive NrfA protein that lacked the active site heme group while at least three of the other hemes were covalently bound [18]. Using *E. coli* strains containing only a single inactivated *nrf* gene, NrfE as well as NrfG (but not NrfF) were demonstrated to be required for formate-dependent nitrite reduction [149]. In contrast, none of the *nrfE*, *F* and *G* genes appeared to be involved in the production of *c*-type cytochromes with CXXCH motifs [149]. The NrfE protein is similar to CcmF whereas NrfF and NrfG are similar to the N-terminal and C-terminal region of CcmH, respectively. CcmF and CcmH most likely belong to a heme lyase complex

that is required for heme attachment to CXXCH motifs [64,177]. It is not known how a heme lyase recognizes a heme binding motif or how the discrimination between histidine and lysine in such a motif is achieved. Recent evidence suggested that CcmH is the best candidate for the recognition of the CXXCH motif [177]. Possibly, this role is taken over by NrfG (or by a NrfFG complex) in case of the CXXCK motif. CcmF and NrfE might be involved in heme delivery to the site of heme ligation rather than in the attachment process itself [177].

The arrangement of the *nrfEFG* genes is not strictly conserved in other  $\gamma$ -proteobacteria (Table 3). In *S. typhimurium* LT2, *nrfE* appears to be fused to *nrfF* while the *H. influenzae* Rd KW20 genome revealed a likely gene fusion of the *nrfF* and *nrfG* genes. The closely related bacteria *H. influenzae* and *P. multocida* PM70 each contain an additional copy of *ccmG* between *nrfE* and *nrfF* (Table 4). CcmG of *E. coli* is a periplasmic thiol:disulfide oxidoreductase that probably serves in keeping the heme binding cysteines of apo-cytochrome *c* in a reduced state [178,179]. In *H. influenzae*, the *nrfE-ccmG2-nrfFG* cluster is not located downstream of *nrfABCD* but is found elsewhere on the genome.

How do system II organisms handle the specific task of heme attachment to the NrfA CXXCK motif? In *W. succinogenes*, a mutant containing an inactivated *nrfI* gene had properties similar to those of the *E. coli nrfEFG* deletion mutant [63]. The enzymatically inactive NrfA was isolated from the *nrfI* mutant and was found to contain the four CXXCH-ligated heme groups while the active site heme group was missing. When the lysine residue of the CXXCK motif was altered to a histidine residue, NrfA was produced with five covalently bound heme groups. Heme attachment to the five CXXCH motifs in the variant NrfA was found to occur also in the absence of the intact *nrfI* gene [63]. It was concluded that distinct heme lyases exist that recognize either the CXXCH or the CXXCK heme binding motif and that the *nrfI* gene product might be the CXXCK-specific heme lyase. The C-terminal third of NrfI is similar to various CcsA proteins which were proposed to function as CXXCH-specific heme lyases in system II. The N-terminal part of NrfI resembles CcsB (Ccs1) proteins, another system II component. The *W. succinogenes* NrfJ protein has some similarity to thioredoxin-like CcsX proteins of system II organisms but it lacks the common CXXC signature. As a *nrfJ* deletion mutant of *W. succinogenes* had wild-type properties with respect to nitrite respiration and nitrite reductase activity, *nrfJ* might be a pseudogene or its function is taken over by another system II protein in the mutant cells [26].

Like *W. succinogenes*, *S. deleyianum* also possesses a *nrfHAIJ* locus (Table 3). The *nrfHA* genes of *P. gingivalis* are followed by three genes (*nrfKLM*) whose function might be similar to that of *W. succinogenes nrfI* [20]. The predicted NrfM protein resembles the C-terminal re-

gion of *W. succinogenes* NrfI including the tryptophan-rich stretch (Table 4). In contrast, accessory *nrf* genes were not found downstream of *nrfA* on the genomes of *C. jejuni*, *G. sulfurreducens*, *D. vulgaris* and *C. hydrogeniformans* (Table 3). In case of *C. jejuni* this observation is not unexpected as the corresponding NrfA protein lacks the CXXCK motif. However, it is unclear how the  $\delta$ -proteobacteria and the Gram-positive organism manage heme attachment to the CXXCK motif of NrfA. Possibly, accessory *nrf* genes are situated elsewhere on the genome. Alternatively, it cannot be excluded that in these organisms a single heme lyase is able to attach heme to both the CXXCH and CXXCK motifs.

Taken together, the results indicate that, at least in *E. coli* and *W. succinogenes*, heme ligation to the CXXCK heme binding motif requires specialized heme lyases which cannot be replaced by those serving in heme ligation to the CXXCH motif. The specific heme lyases probably evolved from the existing cytochrome *c* biogenesis system resulting in *nrfEFG* genes in system I and *nrfIJ* genes in system II. The function of some of these genes, namely *nrfF* and *nrfJ*, might also be carried out by proteins of the conventional cytochrome *c* biogenesis system. Surprisingly, the occurrence of the *nrfHA* genes correlates strictly with the presence of system II as do the *nrfBCD* genes with system I (Table 3). It is not known whether this finding has any biological significance.

## 7. Respiratory nitrate reductases in *nrfA*-containing organisms

Organisms capable of nitrite ammonification usually also catalyze nitrate reduction to nitrite in dissimilatory metabolism (Table 1). A notable exception are  $\delta$ -proteobacteria where the ability of nitrate reduction is restricted to only a few species like *D. desulfuricans* and *D. propionicus* [51]. Thus, the majority of sulfate-reducing *Desulfovibrio* species use nitrite, but not nitrate [60]. Like nitrite ammonification, nitrate reduction may be categorized as an assimilatory, dissimilatory or respiratory process (Fig. 1) [1]. Assimilatory nitrate reduction is catalyzed by the cytoplasmic Nas enzyme using NAD(P)H as electron donor [82]. Respiratory nitrate reduction is dependent either on a membrane-bound nitrate reductase, the NarGHI complex [180], or on a periplasmic nitrate reductase, the NapAB complex [82,83]. The NarGHI complex is oriented to the cytoplasmic side of the membrane, and a  $\Delta p$  is generated by a redox loop mechanism during reduction of nitrate by a respiratory quinol [98]. NarG is the molybdopterin-containing catalytic subunit that receives electrons from the iron-sulfur subunit NrfH. The enzyme is anchored in the membrane by NarI, a diheme cytochrome *b* quinol oxidase. The periplasmic NapA is also a molybdoprotein that usually forms a complex with the diheme cytochrome *c* NapB. The crystal structure of NapA from

*D. desulfuricans* is known [96]. It is assumed that the tetraheme cytochrome *c* NapC is the electron mediator between the quinone pool and the NapAB complex (cf. Section 3.1.2). The *napA*, *B* and *C* genes are commonly found in gene clusters that consist of up to seven open reading frames [82,83]. The composition of the *nap* loci varies considerably in different bacteria and the function of genes additional to *napA*, *B* and *C* remains to be elucidated. The electron transfer from quinol to nitrate catalyzed by the Nap enzyme is not considered to contribute to  $\Delta p$  generation. However, Nap might be involved in respiratory nitrate reduction when a membrane-bound dehydrogenase complex couples substrate oxidation by quinone to  $\Delta p$  generation. Such a function would be similar to that of the NrfHA cytochrome *c* nitrite reductase in respiratory nitrite ammonification.

Bacteria containing the *nrfHA* genes often possess a *nap* gene cluster whereas *nar* genes were not reported so far (Table 3). All  $\gamma$ -proteobacteria with a *nrfA* gene also contain *nap* genes but only some of them have a *nar* gene cluster. The presence of the Nap and Nrf pathways should enable periplasmic nitrate ammonification without transport of nitrate and nitrite across the membrane. The presence of both Nar and Nap enzymes was reported for  $\alpha$ -,  $\beta$ - and  $\gamma$ -proteobacteria but was not yet shown to occur within the  $\delta$ - or the  $\epsilon$ -subclass [82]. Different functions were assigned to Nap and Nar when present in the same cell. In *E. coli*, for example, the Nar enzyme is the dominant nitrate reductase in the presence of nitrate in the mM range while Nap appears to play a role in nitrate scavenging at low nitrate concentrations [4,82,83,181].

## 8. Concluding remarks

The NrfA protein is a key enzyme in the presented pathways of respiratory nitrite ammonification. The electron transport chain catalyzing nitrite reduction by formate (or  $H_2$ ) is well understood only in the case of *W. succinogenes* where it was shown to consist of only two enzyme complexes with menaquinone as the redox mediator. The composition of the electron transport chains leading to NrfA in other bacteria is less clear. Possibly, additional electron transfer proteins are involved or the mechanism of  $\Delta p$  generation differs from that of *W. succinogenes*. Furthermore, it is uncertain whether the quinone pool is generally required for electron transport to NrfA. Future work will hopefully elucidate the structure and interaction of those proteins involved in the different electron transfer pathways to cytochrome *c* nitrite reductase.

## Acknowledgements

I dedicate this review to my teacher Prof. Achim Kröger who died suddenly in June 2002. His guidance and sup-

port will be greatly missed. I thank all members in the lab in Frankfurt and all my co-authors of cited publications for the fruitful collaboration and for many stimulating discussions. I am also thankful to David J. Richardson, So Iwata and Peter M.H. Kroneck for communication of unpublished data and to Oliver Einsle for the preparation of Fig. 3. Many thanks are expressed to Monica Sanger for carefully reading the manuscript. Work carried out in Frankfurt was supported by the Deutsche Forschungsgemeinschaft (SFB 472) and by the Fonds der Chemischen Industrie.

## References

- [1] Moreno-Vivian, C. and Ferguson, S.J. (1998) Definition and distinction between assimilatory, dissimilatory and respiratory pathways. *Mol. Microbiol.* 29, 661–669.
- [2] Lin, J.T. and Stewart, V. (1998) Nitrate assimilation by bacteria. *Adv. Microb. Phys.* 39, 1–30.
- [3] Campbell, W.H. and Kinghorn, J.R. (1990) Functional domains of assimilatory nitrate reductases and nitrite reductases. *Trends Biochem. Sci.* 15, 315–319.
- [4] Cole, J. (1996) Nitrate reduction to ammonia by enteric bacteria: redundancy, or a strategy for survival during oxygen starvation? *FEMS Microbiol. Lett.* 136, 1–11.
- [5] Zumft, W.G. (1997) Cell biology and molecular basis of denitrification. *Microbiol. Mol. Biol. Rev.* 61, 533–616.
- [6] Moura, I. and Moura, J.J.G. (2001) Structural aspects of denitrifying enzymes. *Curr. Opin. Chem. Biol.* 5, 168–175.
- [7] Cole, J.A. and Brown, C.M. (1980) Nitrite reduction to ammonia by fermentative bacteria: a short circuit in the biological nitrogen cycle. *FEMS Microbiol. Lett.* 7, 65–72.
- [8] Fujita, T. (1966) Studies on soluble cytochromes in *Enterobacteriaceae*. I. Detection, purification, and properties of cytochrome *c*-552 in anaerobically grown cells. *J. Biochem.* 60, 204–215.
- [9] Liu, M.-C., Peck Jr., H.D., Abou-Jaoude, A., Chippaux, M. and LeGall, J. (1981) A reappraisal of the role of the low potential *c*-type cytochrome (cytochrome *c*-552) in NADH-dependent nitrite reduction and its relationship with a co-purified NADH oxidase in *Escherichia coli* K-12. *FEMS Microbiol. Lett.* 10, 333–337.
- [10] Kajie, S. and Anraku, Y. (1986) Purification of a hexaheme cytochrome *c*<sub>552</sub> from *Escherichia coli* K12 and its properties as a nitrite reductase. *Eur. J. Biochem.* 154, 457–463.
- [11] Liu, M.-C. and Peck Jr., H.D. (1981) The isolation of a hexaheme cytochrome from *Desulfovibrio desulfuricans* and its identification as a new type of nitrite reductase. *J. Biol. Chem.* 256, 13159–13164.
- [12] Liu, M.-C., Liu, M.-Y., Payne, W.J., Peck Jr., H.D. and LeGall, J. (1983) *Wolinella succinogenes* nitrite reductase: purification and properties. *FEMS Microbiol. Lett.* 19, 201–206.
- [13] Schröder, I., Robertson, A.M., Bokranz, M., Unden, G., Bocher, R. and Kroger, A. (1985) The membraneous nitrite reductase involved in the electron transport of *Wolinella succinogenes*. *Arch. Microbiol.* 140, 380–386.
- [14] Schumacher, W., Hole, U. and Kroneck, P.M.H. (1994) Ammonia-forming cytochrome *c* nitrite reductase from *Sulfurospirillum deleyianum* is a tetraheme protein: new aspects of the molecular composition and spectroscopic properties. *Biochem. Biophys. Res. Commun.* 205, 911–916.
- [15] Prakash, O. and Sadana, J.C. (1972) Purification, characterisation and properties of nitrite reductase of *Achromobacter fischeri*. *Arch. Biochem. Biophys.* 148, 614–632.
- [16] Liu, M.-C., Bakel, B.W., Liu, M.-Y. and Dao, T.N. (1988) Purifica-



- tion of *Vibrio fischeri* nitrite reductase and its characterization as a hexaheme *c*-type cytochrome. Arch. Biochem. Biophys. 262, 259–265.
- [17] Darwin, A., Hussain, H., Griffiths, L., Grove, J., Sambongi, Y., Busby, S. and Cole, J. (1993) Regulation and sequence of the structural gene for cytochrome *c*<sub>552</sub> from *Escherichia coli*: not a hexahaem but a 50 kDa tetrahaem nitrite reductase. Mol. Microbiol. 9, 1255–1265.
- [18] Eaves, D.J., Grove, J., Staudenmann, W., James, P., Poole, R.K., White, S.A., Griffiths, I. and Cole, J.A. (1998) Involvement of products of the *nrfEFG* genes in the covalent attachment of haem *c* to a novel cysteine-lysine motif in the cytochrome *c*<sub>552</sub> nitrite reductase from *Escherichia coli*. Mol. Microbiol. 28, 205–216.
- [19] Einsle, O., Messerschmidt, A., Stach, P., Bourenkov, G.P., Bartunik, H.D., Huber, R. and Kroneck, P.M.K. (1999) Structure of cytochrome *c* nitrite reductase. Nature 400, 476–480.
- [20] Einsle, O., Stach, P., Messerschmidt, A., Simon, J., Kröger, A., Huber, R. and Kroneck, P.M.H. (2000) Cytochrome *c* nitrite reductase from *Wolinella succinogenes*: Structure at 1.6 Å resolution, inhibitor binding and heme-packing motifs. J. Biol. Chem. 275, 39608–39616.
- [21] Bamford, V.A., Angrove, H.C., Seward, H.E., Thomson, A.J., Cole, J.A., Butt, J.N., Hemmings, A.M. and Richardson, D.J. (2002) Structure and spectroscopy of the periplasmic cytochrome *c* nitrite reductase from *Escherichia coli*. Biochemistry 41, 2921–2931.
- [22] Motteram, P.A.S., McCarthy, J.E.G., Ferguson, S.J., Jackson, J.B. and Cole, J.A. (1981) Energy conservation during formate-dependent reduction of nitrite by *Escherichia coli*. FEMS Microbiol. Lett. 12, 317–320.
- [23] Pope, N.R. and Cole, J.A. (1982) Generation of a membrane potential by one of two independent pathways for nitrite reduction by *Escherichia coli*. J. Gen. Microbiol. 128, 219–222.
- [24] Steenkamp, D.J. and Peck Jr., H.D. (1981) Proton translocation associated with nitrite respiration in *Desulfovibrio desulfuricans*. J. Biol. Chem. 256, 5450–5458.
- [25] Barton, L.L., LeGall, J., Odom, J.M. and Peck Jr., H.D. (1983) Energy coupling to nitrite respiration in the sulfate-reducing bacterium *Desulfovibrio gigas*. J. Bacteriol. 153, 867–871.
- [26] Simon, J., Gross, R., Einsle, O., Kroneck, P.M.H., Kröger, A. and Klimmek, O. (2000) A NapC/NirT-type cytochrome *c* (NrfH) is the mediator between the quinone pool and the cytochrome *c* nitrite reductase of *Wolinella succinogenes*. Mol. Microbiol. 35, 686–696.
- [27] Tyson, K., Metheringham, R., Griffiths, L. and Cole, J. (1997) Characterisation of *Escherichia coli* K-12 mutants defective in formate-dependent nitrite reduction: essential roles for *hemN* and the *menFDBCE* operon. Arch. Microbiol. 168, 403–411.
- [28] Simon, J., Pisa, R., Stein, T., Eichler, R., Klimmek, O. and Gross, R. (2001) The tetraheme cytochrome *c* NrfH is required to anchor the cytochrome *c* nitrite reductase in the membrane of *Wolinella succinogenes*. Eur. J. Biochem. 268, 5776–5782.
- [29] Einsle, O., Schumacher, W., Kurun, E., Nath, U., and Kroneck, P.M.H. (1998) Cytochrome *c* nitrite reductase from *Sulfurospirillum deleyianum* and *Wolinella succinogenes*. In: Biological Electron Transfer Chains: Genetics, Composition and Mode of Operation (Canthers, G.W. and Vijgenboom, E., Eds), pp. 197–208. Kluwer Academic, Dordrecht.
- [30] Schumacher, W., Neese, F., Hole, U. and Kroneck P.M.H. (1997) Cytochrome *c* nitrite reductase and nitrous oxide reductase: two metallo enzymes of the nitrogen cycle with novel metal sites. In: Transition Metals in Microbial Metabolism (Winkelmann, G. and Carrano, C.J., Eds.), pp. 329–356. Harwood Academic, London.
- [31] Moura, I., Bursakov, S., Costa, C. and Moura, J.J.G. (1997) Nitrate and nitrite utilization in sulfate-reducing bacteria. Anaerobe 3, 279–290.
- [32] Uden, G. and Bongaerts, J. (1997) Alternative respiratory pathways of *Escherichia coli*: energetics and transcriptional regulation in response to electron acceptors. Biochim. Biophys. Acta 1320, 217–234.
- [33] Berks, B.C., Ferguson, S.J., Moir, J.W.B. and Richardson, D.J. (1995) Enzymes and associated electron transport systems that catalyse the respiratory reduction of nitrogen oxides and oxyanions. Biochim. Biophys. Acta 1232, 97–173.
- [34] Brittain, T., Blackmore, R., Greenwood, C. and Thomson, A.J. (1992) Bacterial nitrite-reducing enzymes. Eur. J. Biochem. 209, 793–802.
- [35] Cole, J.A. (1988) Assimilatory and dissimilatory reduction of nitrate to ammonia. In: The Nitrogen and Sulphur Cycles (Cole, J.A. and Ferguson, S.J., Eds.), pp. 281–329. Symposia of the Society for General Microbiology 42, Cambridge University Press, Cambridge.
- [36] Richardson, D.J. (2000) Bacterial respiration: a flexible process for a changing environment. Microbiology 146, 551–571.
- [37] Richardson, D.J. and Watmough, N.J. (1999) Inorganic nitrogen metabolism in bacteria. Curr. Opin. Chem. Biol. 3, 207–219.
- [38] Eisenmann, E., Beuerle, J., Sulger, K., Kroneck, P.M.H. and Schumacher, W. (1995) Lithotrophic growth of *Sulfurospirillum deleyianum* with sulfide as electron donor coupled to respiratory reduction of nitrate to ammonia. Arch. Microbiol. 164, 180–185.
- [39] Kröger, A., Biel, S., Simon, J., Gross, R., Uden, G. and Lancaster, C.R.D. (2002) Fumarate respiration of *Wolinella succinogenes*: enzymology, energetics, and coupling mechanism. Biochim. Biophys. Acta 1553, 23–38.
- [40] Bokranz, M., Katz, J., Schröder, I., Robertson, A.M. and Kröger, A. (1983) Energy metabolism and biosynthesis of *Vibrio succinogenes* growing with nitrate or nitrite as terminal electron acceptor. Arch. Microbiol. 135, 36–41.
- [41] Simon, J., Gross, R., Klimmek, O. and Kröger, A. (2000) The genus *Wolinella*. In: The Prokaryotes: An Evolving Electronic Resource for the Microbiological Community, 3rd edn. (Dworkin, M., Falkow, S., Rosenberg, E., Schleifer, K.-H. and Stackebrandt, E., Eds.). Springer-Verlag, New York.
- [42] Yoshinari, T. (1980) N<sub>2</sub>O reduction by *Vibrio succinogenes*. Appl. Environ. Microbiol. 39, 81–84.
- [43] Lorenzen, J.P., Steinwachs, S. and Uden, G. (1994) DMSO respiration by the anaerobic rumen bacterium *Wolinella succinogenes*. Arch. Microbiol. 162, 277–281.
- [44] Schumacher, W. and Kroneck, P.M.H. (1992) Anaerobic energy metabolism of the sulfur-reducing bacterium ‘Spirillum’ 5175 during dissimilatory nitrate reduction to ammonia. Arch. Microbiol. 157, 464–470.
- [45] Collins, M.D. and Widdel, F. (1986) Respiratory quinones of sulphate-reducing and sulphur-reducing bacteria: a systematic investigation. Syst. Appl. Microbiol. 8, 8–18.
- [46] Zöphel, A., Kennedy, M.C., Beinert, H. and Kroneck, P.M.H. (1991) Investigations on microbial sulfur respiration. Isolation, purification, and characterization of cellular components from Spirillum 5175. Eur. J. Biochem. 195, 849–856.
- [47] de Vries, W., Niekus, H.G.D., Boellard, M. and Stouthamer, A.H. (1980) Growth yields and energy generation by *Campylobacter sputorum* subspecies *bubulus* during growth in continuous culture with different hydrogen acceptors. Arch. Microbiol. 124, 221–227.
- [48] de Vries, W., Niekus, H.G.D., van Berchum, H. and Stouthamer, A.H. (1982) Electron transport-linked proton translocation at nitrite reduction in *Campylobacter sputorum* subspecies *bubulus*. Arch. Microbiol. 131, 132–139.
- [49] Schumacher, W., Kroneck, P.M.H. and Pfennig, N. (1992) Comparative systematic study on ‘Spirillum’ 5175, *Campylobacter* and *Wolinella* species. Description of ‘Spirillum’ 5175 as *Sulfurospirillum deleyianum* gen. nov., spec. nov.. Arch. Microbiol. 158, 287–293.
- [50] Steenkamp, D.J. and Peck Jr., H.D. (1980) The association of hydrogenase and dithionite reductase activities with the nitrite reductase of *Desulfovibrio desulfuricans*. Biochem. Biophys. Res. Commun. 94, 41–48.
- [51] Seitz, H.-J. and Cypionka, H. (1986) Chemolithotrophic growth of *Desulfovibrio desulfuricans* with hydrogen coupled to ammonification of nitrate or nitrite. Arch. Microbiol. 146, 63–67.
- [52] Rabus, R., Hansen, T. and Widdel, F. (2001) Dissimilatory sulfate-

- and sulfur-reducing prokaryotes. In: *The Prokaryotes: An Evolving Electronic Resource for the Microbiological Community*, 3rd edn. (Dworkin, M., Falkow, S., Rosenberg, E., Schleifer, K.-H. and Stackebrandt, E., Eds.). Springer-Verlag, New York.
- [53] Odom, J.M. and Peck Jr., H.D. (1981) Localization of dehydrogenases, reductases, and electron transfer components in the sulfate-reducing bacterium *Desulfovibrio gigas*. *J. Bacteriol.* 147, 161–169.
- [54] Wissenbach, U., Kröger, A. and Uden, G. (1990) The specific functions of menaquinone and demethylmenaquinone in anaerobic respiration with fumarate, dimethylsulfoxide, trimethyl N-oxide and nitrate by *Escherichia coli*. *Arch. Microbiol.* 154, 60–66.
- [55] Wolin, M.J., Wolin, E.A. and Jacobs, N.J. (1961) Cytochrome-producing anaerobic vibrio, *Vibrio succinogenes* sp. n. *J. Bacteriol.* 81, 911–917.
- [56] Hedderich, R., Klimmek, O., Kröger, A., Dirmeier, R., Keller, M. and Stetter, K.O. (1999) Anaerobic respiration with sulfur and with organic disulfides. *FEMS Microbiol. Rev.* 22, 353–381.
- [57] Kröger, A., Geisler, V., Lemma, E., Theis, F. and Lenger, R. (1992) Bacterial fumarate respiration. *Arch. Microbiol.* 158, 311–314.
- [58] Macy, J.M., Schröder, I., Thauer, R.K. and Kröger, A. (1986) Growth of *Wolinella succinogenes* on H<sub>2</sub>S plus fumarate and on formate plus sulfur as energy sources. *Arch. Microbiol.* 144, 147–150.
- [59] Widdel, F. and Pfennig, N. (1982) Studies on dissimilatory sulfate-reducing bacteria that decompose fatty acids. II. Incomplete oxidation of propionate by *Desulfobulbus propionicus* gen. nov., sp. nov. *Arch. Microbiol.* 131, 360–365.
- [60] Mitchell, G.J., Jones, J.G. and Cole, J.A. (1986) Distribution and regulation of nitrate and nitrite reduction by *Desulfovibrio* and *Desulfotomaculum* species. *Arch. Microbiol.* 144, 35–40.
- [61] Dannenberg, S., Kroder, M., Dilling, W. and Cypionka, H. (1992) Oxidation of H<sub>2</sub>, organic compounds and inorganic sulfur compounds coupled to reduction of O<sub>2</sub> or nitrate by sulfate-reducing bacteria. *Arch. Microbiol.* 158, 93–99.
- [62] Lorenzen, J.P., Kröger, A. and Uden, G. (1993) Regulation of anaerobic pathways in *Wolinella succinogenes* by the presence of electron acceptors. *Arch. Microbiol.* 159, 477–483.
- [63] Pisa, R., Stein, T., Eichler, R., Gross, R. and Simon, J. (2002) The *nrfI* gene is essential for the attachment of the active site haem group of *Wolinella succinogenes* cytochrome *c* nitrite reductase. *Mol. Microbiol.* 43, 763–770.
- [64] Thöny-Meyer, L. (1997) Biogenesis of respiratory cytochromes in bacteria. *Microbiol. Mol. Biol. Rev.* 61, 337–376.
- [65] Simon, J., Gross, R., Klimmek, O., Ringel, M. and Kröger, A. (1998) A periplasmic flavoprotein in *Wolinella succinogenes* that resembles the fumarate reductase of *Shewanella putrefaciens*. *Arch. Microbiol.* 169, 424–433.
- [66] Liu, M.-C., Liu, M.-Y., Payne, W.J., Peck Jr., H.D., LeGall, J. and DerVartanian, D.V. (1987) Comparative EPR studies on the nitrite reductase from *Escherichia coli* and *Wolinella succinogenes*. *FEBS Lett.* 218, 227–230.
- [67] Stach, P., Einsle, O., Schumacher, W., Kurun, E. and Kroneck, P.M.H. (2000) Bacterial cytochrome *c* nitrite reductase: new structural and functional aspects. *J. Inorg. Biochem.* 79, 381–385.
- [68] Einsle, O., Messerschmidt, A., Huber, R., Kroneck, P.M.H. and Neese, F. (2002) Mechanism of the six-electron reduction of nitrite to ammonia by cytochrome *c* nitrite reductase. *J. Am. Chem. Soc.*, in press.
- [69] Barker, P.D. and Ferguson, S.J. (1999) Still a puzzle: why is haem covalently attached in *c*-type cytochromes. *Structure* 7, R281–R290.
- [70] Igarashi, N., Moriyama, H., Fujiwara, T., Fukumori, Y. and Tanaka, N. (1998) The 2.8 Å structure of hydroxylamine oxidoreductase from a nitrifying chemoautotrophic bacterium, *Nitrosomonas europaea*. *Nature Struct. Biol.* 4, 276–284.
- [71] Liu, M.-C., DerVartanian, D.V. and Peck Jr., H.D. (1980) On the nature of the oxidation-reduction properties of nitrite reductase from *Desulfovibrio desulfuricans*. *Biochem. Biophys. Res. Commun.* 96, 278–285.
- [72] Blackmore, R.S., Brittain, T., Gadsby, P.M., Greenwood, C. and Thomson, A.J. (1987) Electron paramagnetic resonance and magnetic circular dichroism studies of a hexa-heme nitrite reductase from *Wolinella succinogenes*. *FEBS Lett.* 219, 244–248.
- [73] Costa, C., Moura, J.J.G., Moura, I., Liu, M.-Y., Peck Jr., H.D., LeGall, J., Wang, Y.N. and Huynh, B.H. (1990) Hexaheme nitrite reductase from *Desulfovibrio desulfuricans*. Mössbauer and EPR characterization of the heme groups. *J. Biol. Chem.* 265, 14382–14388.
- [74] Costa, C., Moura, J.J.G., Moura, I., Wang, Y. and Huynh, B.H. (1996) Redox properties of cytochrome *c* nitrite reductase from *Desulfovibrio desulfuricans* ATCC 27774. *J. Biol. Chem.* 271, 23191–23196.
- [75] Pereira, I.C., Abreu, I.A., Xavier, A.V., LeGall, J. and Teixeira, M. (1996) Nitrite reductase from *Desulfovibrio desulfuricans* (ATCC 27774) – a heterooligomer heme protein with sulfite reductase activity. *Biochem. Biophys. Res. Commun.* 224, 611–618.
- [76] Pereira, I.A.C., LeGall, J., Xavier, A.V. and Teixeira, M. (2000) Characterization of a heme *c* nitrite reductase from a non-ammonifying microorganism, *Desulfovibrio vulgaris* Hildenborough. *Biochim. Biophys. Acta* 1481, 119–130.
- [77] Blackmore, R.S., Gadsby, P.M., Greenwood, C. and Thomson, A.J. (1990) Spectroscopic studies of partially reduced forms of *Wolinella succinogenes* nitrite reductase. *FEBS Lett.* 264, 257–262.
- [78] Einsle, O., Stach, P., Messerschmidt, A., Klimmek, O., Simon, J., Kröger, A. and Kroneck, P.M.H. (2002) Crystallization and preliminary X-ray analysis of the membrane-bound cytochrome *c* nitrite reductase complex (NrfHA) from *Wolinella succinogenes*. *Acta Crystallogr. D* 58, 341–342.
- [79] Roldán, M.D., Sears, H.J., Cheesman, M.R., Ferguson, S.J., Thomson, A.J., Berks, B.C. and Richardson, D.J. (1998) Spectroscopic characterization of a novel multiheme *c*-type cytochrome widely implicated in bacterial electron transport. *J. Biol. Chem.* 273, 28785–28790.
- [80] Jünger, A., Wakabayashi, S., Matsubara, H. and Zumft, W.G. (1991) The *nirSTBM* region coding for cytochrome *cd*<sub>1</sub>-dependent nitrite respiration of *Pseudomonas stutzeri* consists of a cluster of mono-, di-, and tetraheme proteins. *FEBS Lett.* 279, 205–209.
- [81] Ferguson, S.J. (2001) Keilin's cytochromes: how bacteria use them, vary them and make them. *Biochem. Soc. Trans.* 29, 629–640.
- [82] Richardson, D.J., Berks, B.C., Russell, D.A., Spiro, S. and Taylor, C.J. (2001) Functional, biochemical and genetic diversity of prokaryotic nitrate reductases. *Cell. Mol. Life Sci.* 58, 165–178.
- [83] Potter, L., Angove, H., Richardson, D. and Cole, J. (2001) Nitrate reduction in the periplasm of gram-negative bacteria. *Adv. Microb. Phys.* 45, 51–112.
- [84] Gon, S., Giudici-Ortoni, M.-T., Méjean, V. and Iobbi-Nivol, C. (2001) Electron transfer and binding of the *c*-type cytochrome TorC to the trimethylamine *N*-oxide reductase in *Escherichia coli*. *J. Biol. Chem.* 276, 11545–11551.
- [85] Field, S.J., Dobbin, P.S., Cheesman, M.R., Watmough, N.J., Thomson, A.J. and Richardson, D.J. (2000) Purification and magneto-optical spectroscopic characterization of cytoplasmic membrane and outer membrane multiheme *c*-type cytochromes from *Shewanella frigidimarina* NCIMB400. *J. Biol. Chem.* 275, 8515–8522.
- [86] Shaw, A.L., Hochkoeppler, A., Bonora, P., Zannoni, D., Hanson, G.R. and McEwan, A.G. (1999) Characterization of DorC from *Rhodobacter capsulatus*, a *c*-type cytochrome involved in electron transfer to dimethyl sulfoxide reductase. *J. Biol. Chem.* 274, 9911–9914.
- [87] Bokranz, M., Gutmann, M., Körtner, C., Kojro, E., Fahrenholz, F., Lauterbach, F. and Kröger, A. (1991) Cloning and nucleotide sequence of the structural genes encoding formate dehydrogenase of *Wolinella succinogenes*. *Arch. Microbiol.* 156, 119–128.
- [88] Lenger, R., Herrmann, U., Gross, R., Simon, J. and Kröger, A. (1997) Structure and function of a second gene cluster encoding the formate dehydrogenase of *Wolinella succinogenes*. *Eur. J. Biochem.* 246, 646–651.

- [89] Jankielewicz, A., Schmitz, R.A., Klimmek, O. and Kröger, A. (1994) Polysulphide reductase and formate dehydrogenase from *Wolinella succinogenes* contain molybdopterin guanine dinucleotide. *Arch. Microbiol.* 162, 238–242.
- [90] Unden, G. and Kröger, A. (1982) Reconstitution in liposomes of the electron transport chain catalyzing fumarate reduction by formate. *Biochim. Biophys. Acta* 682, 258–263.
- [91] Unden, G. and Kröger, A. (1983) Low-potential cytochrome *b* as an essential electron-transport component of menaquinone reduction by formate in *Vibrio succinogenes*. *Biochim. Biophys. Acta* 725, 325–331.
- [92] Kröger, A., Dorrer, E. and Winkler, E. (1980) The orientation of the substrate sites of formate dehydrogenase and fumarate reductase in the membrane of *Vibrio succinogenes*. *Biochim. Biophys. Acta* 589, 118–136.
- [93] Berks, B.C. (1996) A common export pathway for proteins binding complex redox cofactors? *Mol. Microbiol.* 22, 393–404.
- [94] Jormakka, M., Tornroth, S., Byrne, B. and Iwata, S. (2002) Molecular basis of proton motive force generation: Structure of formate dehydrogenase-N. *Science* 295, 1863–1868.
- [95] Schindelin, H., Kisker, C., Hilton, J., Rajagopalan, K.V. and Rees, D.C. (1996) Crystal structure of DMSO reductase: redox-linked changes in molybdopterin coordination. *Science* 272, 1615–1621.
- [96] Dias, J.M., Than, M.E., Humm, A., Huber, R., Bourenkov, G.P., Bartunik, H.D., Bursakov, S., Calvete, J., Caldeira, J., Carneiro, C., Moura, J.J.G., Moura, I. and Romão, M.J. (1999) Crystal structure of the first dissimilatory nitrate reductase at 1.9 Å solved by MAD methods. *Structure* 7, 65–79.
- [97] Boyington, J.C., Gladyshev, V.N., Khangulov, S.V., Stadtman, T.C. and Sun, P.D. (1997) Crystal structure of formate dehydrogenase H: catalysis involving Mo, molybdopterin, selenocysteine, and an Fe<sub>4</sub>S<sub>4</sub> cluster. *Science* 275, 1305–1308.
- [98] Berks, B.C., Page, M.D., Richardson, D.J., Reilly, A., Cavill, A., Outen, F. and Ferguson, S.J. (1995) Sequence analysis of subunits of the membrane-bound nitrate reductase from a denitrifying bacterium: the integral membrane subunit provides a prototype for the dihaem electron-carrying arm of a redox loop. *Mol. Microbiol.* 15, 319–331.
- [99] Lancaster, C.R.D., Kröger, A., Auer, M. and Michel, H. (1999) Structure at 2.2 Å resolution of the complex II-like fumarate reductase from *Wolinella succinogenes*. *Nature* 402, 377–385.
- [100] Dross, F., Geisler, V., Lenger, R., Theis, F., Krafft, T., Fahrenholz, F., Kojro, E., Duchêne, A., Tripiet, D., Juvenal, K. and Kröger, A. (1992) The quinone-reactive Ni/Fe-hydrogenase of *Wolinella succinogenes*. *Eur. J. Biochem.* 206, 93–102, erratum *Eur. J. Biochem.* 214, 949–950.
- [101] Gross, R., Simon, J., Theis, F. and Kröger, A. (1998) Two membrane anchors of *Wolinella succinogenes* hydrogenase and their function in fumarate and polysulfide respiration. *Arch. Microbiol.* 170, 50–58.
- [102] Rossmann, R., Maier, T., Lottspeich, F. and Böck, A. (1995) Characterisation of a protease from *Escherichia coli* involved in hydrogenase maturation. *Eur. J. Biochem.* 227, 545–550.
- [103] Parkhill, J., Wren, B.W., Mungall, K., Ketley, J.M., Churcher, C., Basham, D., Chillingworth, T., Davies, R.M., Feltwell, T., Holroyd, S., Jagels, K., Karlyshev, A.V., Moule, S., Pallen, M.J., Penn, C.W., Quail, M.A., Rajandream, M.A., Rutherford, K.M., van Vliet, A.H., Whitehead, S. and Barrell, B.G. (2000) The genome sequence of the food-borne pathogen *Campylobacter jejuni* reveals hypervariable sequences. *Nature* 403, 665–668.
- [104] Tomb, J.F., White, O., Kerlavage, A.R., Clayton, R.A., Sutton, G.G., Fleischmann, R.D., Ketchum, K.A., Klenk, H.P., Gill, S., Dougherty, B.A., Nelson, K., Quackenbush, J., Zhou, L., Kirkness, E.F., Peterson, S., Loftus, B., Richardson, D., Dodson, R., Khalak, H.G., Glodek, A., McKenney, K., Fitzgerald, L.M., Lee, N., Adams, M.D., Hickey, E.K., Berg, D.E., Gocayne, J.D., Utterback, T.R., Peterson, J.D., Kelley, J.M., Cotton, M.D., Weidman, J.M., Fujii, C., Bowman, C., Wattley, L., Wallin, E., Hayes, W.S., Borodovsky, M., Karp, P.D., Smith, O., Fraser, C.M. and Venter, J.C. (1997) The complete genome sequence of the gastric pathogen *Helicobacter pylori*. *Nature* 388, 539–547.
- [105] Gross, R., Simon, J., Lancaster, C.R.D. and Kröger, A. (1998) Identification of histidine residues in *Wolinella succinogenes* hydrogenase that are essential for menaquinone reduction by H<sub>2</sub>. *Mol. Microbiol.* 30, 639–646.
- [106] Gross, R., Simon, J. and Kröger, A. (1999) The role of the twin-arginine motif in the signal peptide encoded by the *hydA* gene of the hydrogenase from *Wolinella succinogenes*. *Arch. Microbiol.* 172, 227–232.
- [107] Wu, L.-F., Chanal, A. and Rodrigue, A. (2000) Membrane targeting and translocation of bacterial hydrogenases. *Arch. Microbiol.* 173, 319–324.
- [108] Rodrigue, A., Chanal, A., Beck, K., Müller, M. and Wu, L.-F. (1999) Co-translocation of a periplasmic enzyme complex by a hitchhiker mechanism through the bacterial *tat* pathway. *J. Biol. Chem.* 274, 13223–13228.
- [109] Berks, B.C., Sargent, F. and Palmer, T. (2000) The *Tat* protein export pathway. *Mol. Microbiol.* 35, 260–274.
- [110] Volbeda, A., Charon, M.-H., Piras, C., Hatchikian, E.C., Frey, M. and Fontecilla-Camps, J.C. (1995) Crystal structure of the nickel-iron hydrogenase from *Desulfovibrio gigas*. *Nature* 373, 580–587.
- [111] Higuchi, Y., Yagi, T. and Yasuoka, N. (1997) Unusual ligand structure in Ni-Fe active center and an additional Mg site in hydrogenase revealed by high-resolution X-ray structure analysis. *Structure* 5, 1671–1680.
- [112] Matias, P.M., Soares, C.M., Saraiva, L.M., Coelho, R., Morais, J., LeGall, J. and Carrondo, M.A. (2001) [NiFe] hydrogenase from *Desulfovibrio desulfuricans* ATCC 27774: gene sequencing, three-dimensional structure determination and refinement at 1.8 Å and modelling studies of its interaction with the tetrahaem cytochrome *c*<sub>3</sub>. *J. Biol. Inorg. Chem.* 6, 63–81.
- [113] Mell, H., Wellnitz, C. and Kröger, A. (1986) The electrochemical proton potential and the proton/electron ratio of the electron transport with fumarate in *Wolinella succinogenes*. *Biochim. Biophys. Acta* 852, 212–221.
- [114] Geisler, V., Ullmann, R. and Kröger, A. (1994) The direction of the proton exchange associated with the redox reactions of menaquinone during the electron transport in *Wolinella succinogenes*. *Biochim. Biophys. Acta* 1184, 219–226.
- [115] Biel, S., Simon, J., Gross, R., Ruiz, T., Ruitenbergh, M. and Kröger, A. (2002) Reconstitution of coupled fumarate respiration in liposomes by incorporating the electron transport enzymes isolated from *Wolinella succinogenes*. *Eur. J. Biochem.* 269, 1974–1983.
- [116] Lancaster, C.R.D., Gross, R. and Simon, J. (2001) A third crystal form of *Wolinella succinogenes* quinol: fumarate reductase reveals domain closure at the site of fumarate reduction. *Eur. J. Biochem.* 268, 1820–1827.
- [117] Lancaster, C.R.D. and Simon, J. (2002) Succinate: quinone oxidoreductases from  $\epsilon$ -proteobacteria. *Biochim. Biophys. Acta* 1553, 84–101.
- [118] Fleischmann, R.D., Adams, M.D., White, O., Clayton, R.A., Kirkness, E.F., Kerlavage, A.R., Bult, C.J., Tomb, J.F., Dougherty, B.A., Merrick, J.M., McKenney, K., Sutton, G., FitzHugh, W., Fields, C., Gocayne, J.D., Scott, J., Shirley, R., Liu, L.-I., Glodek, A., Kelley, J.M., Weidman, J.F., Phillips, C.A., Spriggs, T., Hedblom, E., Cotton, M.D., Utterback, T.R., Hanna, M.C., Nguyen, D.T., Saudek, D.M., Brandon, R.C., Fine, L.D., Fritchman, J.L., Fuhrmann, J.L., Geoghegan, N.S.M., Gnehm, C.L., McDonald, L.A., Small, K.V., Fraser, C.M., Smith, H.A. and Venter, J.C. (1995) Whole-genome random sequencing and assembly of *Haemophilus influenzae* Rd. *Science* 269, 496–512.
- [119] Parkhill, J., Dougan, G., James, K.D., Thomson, N.R., Pickard, D., Wain, J., Churcher, C., Mungall, K.L., Bentley, S.D., Holden, M.T., Sebahia, M., Baker, S., Basham, D., Brooks, K., Chillingworth, T.,

- Connerton, P., Cronin, A., Davis, P., Davies, R.M., Dowd, L., White, N., Farrar, J., Feltwell, T., Hamlin, N., Haque, A., Hien, T.T., Holroyd, S., Jagels, K., Krogh, A., Larsen, T.S., Leather, S., Moule, S., O'Gaora, P., Parry, C., Quail, M., Rutherford, K., Simmonds, M., Skelton, J., Stevens, K., Whitehead, S. and Barrell, B.G. (2001) Complete genome sequence of a multiple drug resistant *Salmonella enterica* serovar Typhi CT18. *Nature* 413, 848–852.
- [120] McClelland, M., Sanderson, K.E., Spieth, J., Clifton, S.W., Lartreille, P., Courtney, L., Porwollik, S., Ali, J., Dante, M., Du, F., Hou, S., Layman, D., Leonard, S., Nguyen, C., Scott, K., Holmes, A., Grewal, N., Mulvaney, E., Ryan, E., Sun, H., Florea, L., Miller, W., Stoneking, T., Nhan, M., Waterston, R. and Wilson, R.K. (2001) Complete genome sequence of *Salmonella enterica* serovar Typhimurium LT2. *Nature* 413, 852–856.
- [121] May, B.J., Zhang, Q., Li, L.L., Paustian, M.L., Whittam, T.S. and Kapur, V. (2001) Complete genomic sequence of *Pasteurella multocida*, Pm70. *Proc. Natl. Acad. Sci. USA* 98, 3460–3465.
- [122] Goldman, B.S., Beck, D.L., Monika, E.M. and Kranz, R.G. (1998) Transmembrane heme delivery systems. *Proc. Natl. Acad. Sci. USA* 95, 5003–5008.
- [123] Schiött, T., von Wachenfeldt, C. and Hederstedt, L. (1997) Identification and characterization of the *ccdA* gene, required for cytochrome *c* synthesis in *Bacillus subtilis*. *J. Bacteriol.* 179, 1962–1973.
- [124] Dias, J.M., Cunha, C.A., Teixeira, S., Almeida, G., Costa, C., Lampreia, J., Moura, J.J.G., Moura, I. and Romão, M.J. (2000) Crystallization and preliminary X-ray analysis of a membrane-bound nitrite reductase from *Desulfovibrio desulfuricans* ATCC 27774. *Acta Crystallogr. D* 56, 215–217.
- [125] Steuber, J., Arendsen, A.F., Hagen, W.R. and Kroneck, P.M.H. (1995) Molecular properties of the dissimilatory sulfite reductase from *Desulfovibrio desulfuricans* (Essex) and comparison with the enzyme from *Desulfovibrio vulgaris* (Hildenborough). *Eur. J. Biochem.* 233, 873–879.
- [126] Vignais, P.M., Billoud, B. and Meyer, J. (2001) Classification and phylogeny of hydrogenases. *FEMS Microbiol. Rev.* 25, 455–501.
- [127] Fauque, G., Peck Jr., H.D., Moura, J.J.G., Huynh, B.H., Berlier, Y., DerVartanian, D.V., Teixeira, M., Przybyla, A.E., Lospinat, P.A., Moura, I. and LeGall, J. (1988) The three classes of hydrogenases from sulfate-reducing bacteria of the genus *Desulfovibrio*. *FEMS Microbiol. Rev.* 54, 299–344.
- [128] Pereira, I.A.C., Romão, C.V., Xavier, A.V., LeGall, J. and Teixeira, M. (1998) Electron transfer between hydrogenases and mono- and multiheme cytochromes in *Desulfovibrio* spp. *J. Biol. Inorg. Chem.* 3, 494–498.
- [129] Einsle, O., Foerster, S., Mann, K., Fritz, G., Messerschmidt, A. and Kroneck, P.M.H. (2001) Spectroscopic investigation and determination of reactivity and structure of the tetraheme cytochrome *c*<sub>3</sub> from *Desulfovibrio desulfuricans* Essex 6. *Eur. J. Biochem.* 268, 3028–3035.
- [130] Morais, J., Palma, P.N., Frazao, C., Caldeira, J., LeGall, J., Moura, I., Moura, J.J.G. and Carrondo, M.A. (1995) Structure of the tetraheme cytochrome from *Desulfovibrio desulfuricans* ATCC 27774: X-ray diffraction and electron paramagnetic resonance studies. *Biochemistry* 34, 12830–12841.
- [131] Nicolet, Y., Piras, C., Legrand, P., Hatchikian, C.E. and Fontecilla-Camps, J.C. (1999) *Desulfovibrio desulfuricans* iron hydrogenase: the structure shows unusual coordination to an active site Fe binuclear center. *Structure* 7, 13–23.
- [132] Morelli, X., Czjzek, M., Hatchikian, C.E., Bornet, O., Fontecilla-Camps, J.C., Palma, N.P., Moura, J.J.G. and Guerlesquin, F. (2000) Structural model of the Fe-hydrogenase/cytochrome *c*<sub>553</sub> complex combining transverse relaxation-optimized spectroscopy experiments and soft docking calculations. *J. Biol. Chem.* 275, 23204–23210.
- [133] Costa, C., Teixeira, M., LeGall, J., Moura, J.J.G. and Moura, I. (1997) Formate dehydrogenase from *Desulfovibrio desulfuricans* ATCC 27774: isolation and spectroscopic characterization of the active sites (heme, iron–sulfur centers and molybdenum). *J. Biol. Inorg. Chem.* 2, 198–208.
- [134] Sebban, C., Blanchard, L., Bruschi, M. and Guerlesquin, F. (1995) Purification and characterization of the formate dehydrogenase from *Desulfovibrio vulgaris* Hildenborough. *FEMS Microbiol. Lett.* 133, 143–149.
- [135] Sebban-Kreuzer, C., Dolla, A. and Guerlesquin, F. (1998) The formate dehydrogenase-cytochrome *c*<sub>553</sub> complex from *Desulfovibrio vulgaris* Hildenborough. *Eur. J. Biochem.* 253, 645–652.
- [136] Blackledge, M., Medvedeva, S., Poncin, M., Guerlesquin, F., Bruschi, M. and Marion, D. (1995) Structure and dynamics of ferrocyclochrome *c*<sub>553</sub> from *Desulfovibrio vulgaris* studied by NMR spectroscopy and restrained molecular dynamics. *J. Mol. Biol.* 245, 661–681.
- [137] Saraiva, L.M., da Costa, P.N., Conte, C., Xavier, A.V. and LeGall, J. (2001) In the facultative sulphate/nitrate reductor *Desulfovibrio desulfuricans* ATCC 27774, the nine-haem cytochrome *c* is part of a membrane-bound redox complex mainly expressed in sulphate-grown cells. *Biochim. Biophys. Acta* 1520, 63–70.
- [138] Matias, P., Coelho, R., Pereira, I.A.C., Coelho, A.V.J., Thompson, A.W., Sieker, A.C., LeGall, J. and Carrondo, M.A. (1999) The primary and three-dimensional structures of a nine-haem cytochrome *c* from *Desulfovibrio desulfuricans* ATCC 27774 reveal a new member of the Hmc family. *Structure* 7, 119–130.
- [139] Matias, P., Saraiva, L.M., Soares, C.M., Coelho, A.V.J., LeGall, J. and Carrondo, M.A. (1999) Nine-haem cytochrome *c* from *Desulfovibrio desulfuricans* ATCC 27774: primary sequence determination, crystallographic refinement at 1.8 Å and modelling studies of its interaction with the tetrahaem cytochrome *c*<sub>3</sub>. *J. Biol. Inorg. Chem.* 4, 478–494.
- [140] Saraiva, L.M., da Costa, P.N. and LeGall, J. (1999) Sequencing the gene encoding *Desulfovibrio desulfuricans* ATCC 27774 nine-heme cytochrome *c*. *Biochem. Biophys. Res. Commun.* 262, 629–634.
- [141] Fritz, G., Griesshaber, D., Seth, O. and Kroneck, P.M.H. (2001) Nonaheme cytochrome *c*, a new physiological electron acceptor for [Ni,Fe] hydrogenase in the sulfate-reducing bacterium *Desulfovibrio desulfuricans* Essex: primary sequence, molecular parameters, and redox properties. *Biochemistry* 40, 1317–1324.
- [142] Umhau, S., Fritz, G., Diederichs, K., Breed, J., Welte, W. and Kroneck, P.M.H. (2001) Three-dimensional structure of the nonaheme cytochrome *c* from *Desulfovibrio desulfuricans* Essex in the Fe(III) state at 1.89 Å resolution. *Biochemistry* 40, 1308–1316.
- [143] Rapp-Giles, B.J., Casalot, L., English, R.S., Ringbauer Jr., J.A., Dolla, A. and Wall, J.D. (2000) Cytochrome *c*<sub>3</sub> mutants of *Desulfovibrio desulfuricans*. *Appl. Environ. Microbiol.* 66, 671–677.
- [144] Bruschi, M., Bertrand, P., More, C., Leroy, G., Bonicel, J., Haladjian, J., Chottard, G., Pollock, W.B.R. and Voordouw, G. (1992) Axial coordination and reduction potentials of the sixteen hemes in high-molecular-mass cytochrome *c* from *Desulfovibrio vulgaris* (Hildenborough). *Biochemistry* 31, 3281–3288.
- [145] Rossi, M., Pollock, W.B.R., Rij, M.W., Keon, R.G., Fu, R. and Voordouw, G. (1993) The *hmc* operon of *Desulfovibrio vulgaris* subsp. *vulgaris* Hildenborough encodes a potential transmembrane redox protein complex. *J. Bacteriol.* 175, 4699–4711.
- [146] Dolla, A., Pohorelic, B.K., Voordouw, J.K. and Voordouw, G. (2000) Deletion of the *hmc* operon of *Desulfovibrio vulgaris* subsp. *vulgaris* Hildenborough hampers hydrogen metabolism and low-redox-potential niche establishment. *Arch. Microbiol.* 174, 143–151.
- [147] Abou-Jaoudé, A., Chippaux, M. and Pascal, M.-C. (1979) Formate-nitrite reduction in *Escherichia coli* K12. 1. Physiological study of the system. *Eur. J. Biochem.* 95, 309–314.
- [148] Rehr, B. and Klemme, J.-H. (1986) Metabolic role and properties of nitrite reductase of nitrate-ammonifying marine *Vibrio* species. *FEMS Microbiol. Lett.* 35, 325–328.
- [149] Grove, J., Busby, S. and Cole, J. (1996) The role of the genes *nrfEFG* and *cmFH* in cytochrome *c* biosynthesis in *Escherichia coli*. *Mol. Gen. Genet.* 252, 332–341.
- [150] Gray, C.T., Wimpenny, J.W.T., Hughes, D.E. and Ranlett, M.



- (1963) A soluble *c*-type cytochrome from anaerobically grown *Escherichia coli* and various Enterobacteriaceae. *Biochim. Biophys. Acta* 67, 157–160.
- [151] Fujita, T. and Sato, S. (1966) Studies on soluble cytochromes in Enterobacteriaceae. IV. Possible involvement of cytochrome *c*-552 in anaerobic nitrite metabolism. *J. Biochem.* 60, 691–700.
- [152] Fujita, T. and Sato, S. (1966) Studies on soluble cytochromes in Enterobacteriaceae. III. Localization of cytochrome *c*-552 in the surface layer of cells. *J. Biochem.* 60, 568–577.
- [153] Cole, J.A. (1968) Cytochrome *c*<sub>552</sub> and nitrite reduction in *Escherichia coli*. *Biochim. Biophys. Acta* 162, 356–368.
- [154] Page, L., Griffiths, L. and Cole, J.A. (1990) Different physiological roles of two independent pathways for nitrite reduction to ammonia by enteric bacteria. *Arch. Microbiol.* 154, 349–354.
- [155] Wang, H. and Gunsalus, R.P. (2000) The *nrfA* and *nirB* nitrite reductase operons in *Escherichia coli* are expressed differently in response to nitrate than to nitrite. *J. Bacteriol.* 182, 5813–5822.
- [156] Jackson, R.H., Cornish-Bowden, A. and Cole, J.A. (1981) Prosthetic groups of the NADH-dependent nitrite reductase from *Escherichia coli* K12. *Biochem. J.* 193, 861–867.
- [157] Abou-Jaoudé, A., Chippaux, M., Pascal, M.C. and Casse, F. (1977) Formate: a new electron donor for nitrite reduction in *Escherichia coli* K12. *Biochem. Biophys. Res. Commun.* 78, 579–583.
- [158] Abou-Jaoudé, A., Chippaux, M. and Pascal, M.-C. (1979) Formate-nitrite reduction in *Escherichia coli* K12. 2. Identification of components involved in the electron transfer. *Eur. J. Biochem.* 95, 315–321.
- [159] Pope, N.R. and Cole, J.A. (1984) Pyruvate and ethanol as electron donors for nitrite reduction by *Escherichia coli* K12. *J. Gen. Microbiol.* 130, 1279–1284.
- [160] Hussain, H., Grove, J., Griffiths, L., Busby, S. and Cole, J. (1994) A seven-gene operon essential for formate-dependent nitrite reduction by enteric bacteria. *Mol. Microbiol.* 12, 153–163.
- [161] Potter, L.C. and Cole, J.A. (1999) Essential roles for the products of the *napABCD* genes, but not *napFGH*, in periplasmic nitrate reduction by *Escherichia coli* K-12. *Biochem. J.* 344, 69–76.
- [162] Méjean, V., Iobbi-Nivol, C., Lepelletier, M., Giordano, G., Chippaux, M. and Pascal, M.C. (1994) TMAO anaerobic respiration in *Escherichia coli*: involvement of the *tor* operon. *Mol. Microbiol.* 11, 1169–1179.
- [163] Gon, S., Patte, J.C., Méjean, V. and Iobbi-Nivol, C. (2000) The *torYZ* (*vecK bisZ*) operon encodes a third respiratory trimethylamine *N*-oxide reductase in *Escherichia coli*. *J. Bacteriol.* 182, 5779–5786.
- [164] Iobbi-Nivol, C., Croke, H., Griffiths, L., Grove, J., Hussain, H., Pommier, J., Mejean, V. and Cole, J.A. (1994) A reassessment of the range of *c*-type cytochromes synthesized by *Escherichia coli* K-12. *FEMS Microbiol. Lett.* 119, 89–94.
- [165] Dietrich, W. and Klimmek, O. (2002) The function of methyl-menaquinone-6 and polysulfide reductase membrane anchor (PsrC) in polysulfide respiration of *Wolinella succinogenes*. *Eur. J. Biochem.* 269, 1086–1095.
- [166] Sawers, G. (1994) The hydrogenases and formate dehydrogenases of *Escherichia coli*. *Antonie Van Leeuwenhoek* 66, 57–88.
- [167] Darwin, A., Tormay, P., Page, L., Griffiths, L. and Cole, J. (1993) Identification of the formate dehydrogenases and genetic determinants of formate-dependent nitrite reduction by *Escherichia coli* K12. *J. Gen. Microbiol.* 139, 1829–1840.
- [168] Stanley, N.R., Sargent, F., Buchanan, G., Shi, J., Stewart, V., Palmer, T. and Berks, B.C. (2002) Behaviour of topological marker proteins targeted to the Tat protein transport pathway. *Mol. Microbiol.* 43, 1005–1021.
- [169] Jones, R.W. (1980) Proton translocation by the membrane-bound formate dehydrogenase of *Escherichia coli*. *FEBS Microbiol. Lett.* 8, 167–171.
- [170] Benoit, S., Abaibou, H. and Mandrand-Berthelot, M.-A. (1998) Topological analysis of the aerobic membrane-bound formate dehydrogenase of *Escherichia coli*. *J. Bacteriol.* 180, 6625–6634.
- [171] Myers, C.R. and Myers, J.M. (1997) Cloning and sequence of *cymA*, a gene encoding a tetraheme cytochrome *c* required for reduction of iron(III), fumarate, and nitrate by *Shewanella putrefaciens* MR-1. *J. Bacteriol.* 179, 1143–1152.
- [172] Myers, J.M. and Myers, C.R. (2000) Role of the tetraheme cytochrome *CymA* in anaerobic electron transport in cells of *Shewanella putrefaciens* MR-1 with normal levels of menaquinone. *J. Bacteriol.* 182, 67–72.
- [173] Kranz, R., Lill, R., Goldman, B., Bonnard, G. and Merchant, S. (1998) Molecular mechanisms of cytochrome *c* biogenesis: three distinct systems. *Mol. Microbiol.* 29, 383–396.
- [174] Page, M.D., Sambongi, Y. and Ferguson, S.J. (1998) Contrasting routes of *c*-type cytochrome assembly in mitochondria, chloroplasts and bacteria. *Trends Biochem. Sci.* 23, 103–108.
- [175] Beckett, C.S., Loughman, J.A., Karberg, K.A., Donato, G.M., Goldman, W.E. and Kranz, R.G. (2000) Four genes are required for the system II cytochrome *c* biogenesis pathway in *Bordetella pertussis*, a unique bacterial model. *Mol. Microbiol.* 38, 465–481.
- [176] Schulz, H., Pelliccioli, E.C. and Thöny-Meyer, L. (2000) New insights into the role of CcmC, CcmD and CcmE in the haem delivery pathway during cytochrome *c* maturation by a complete mutational analysis of the conserved tryptophan-rich motif of CcmC. *Mol. Microbiol.* 37, 1379–1388.
- [177] Ren, Q., Ahuja, U. and Thöny-Meyer, L. (2002) A bacterial cytochrome *c* heme lyase: CcmF forms a complex with the heme chaperone CcmE and CcmH, but not with apocytochrome *c*. *J. Biol. Chem.* 277, 7657–7663.
- [178] Fabianek, R.A., Hennecke, H. and Thöny-Meyer, L. (2000) Periplasmic protein thiol:disulfide oxidoreductases of *Escherichia coli*. *FEMS Microbiol. Rev.* 24, 303–316.
- [179] Reid, E., Cole, J. and Eaves, D.J. (2001) The *Escherichia coli* CcmG protein fulfils a specific role in cytochrome *c* assembly. *Biochem. J.* 355, 51–58.
- [180] Blasco, F., Guigliarelli, B., Magalon, A., Asso, M., Giordano, G. and Rothery, R.A. (2001) The coordination and function of the redox centres of the membrane-bound nitrate reductases. *Cell. Mol. Life Sci.* 58, 179–193.
- [181] Wang, H., Tseng, C.P. and Gunsalus, R.P. (1999) The *napF* and *narG* nitrate reductase operons in *Escherichia coli* are differentially expressed in response to submicromolar concentrations of nitrate but not nitrite. *J. Bacteriol.* 181, 5303–5308.
